# Supplementary material for: Association Between Moderate‐to‐Vigorous Physical Activity and the Risk of Major Adverse Cardiovascular Events or Mortality in People With Various Metabolic Syndrome Status: A Nationwide Population‐Based Cohort Study Including 6 Million People
Source: PubMed Central journal article supplement — J Am Heart Assoc. 2020 Nov 6;9(22):e016806. doi: 10.1161/JAHA.120.016806 (PMC7763708; doi:10.1161/jaha.120.016806), 2020-11-06
Supplement: JAH3-9-e016806-s001.pdf [file JAH3-9-e016806-s001.pdf]

# **SUPPLEMENTAL MATERIAL**

## **Data S1.**

### **Supplemental Methods**

#### **Details regarding data collection.**

##### ***Collected clinicodemographic variables***

The following information was collected at the third health screening (S3) as baseline characteristics: age, sex, body mass index (BMI), waist circumference, systolic and diastolic blood pressure, fasting glucose, total cholesterol, high-density lipoprotein cholesterol, triglycerides, serum creatinine, estimated glomerular filtration rate, alanine transaminase, aspartate transaminase, and hemoglobin. Those who were included in the lowest quartile of the nation's income were defined as the low-income group. The Charlson Comorbidity Index was used to represent the burden of underlying comorbidities in the included people. A diagnostic code category identified multiple times within a year before the baseline health screening (S3) was considered to indicate a comorbidity, and the definition for the diagnostic codes followed a reference.<sup>26</sup> The number of present MetS components was collected, both at baseline (S3) and at a prior health screening (S1), to describe the metabolic burden in each study subgroup. We also collected other lifestyle variables from the questionnaire results: smoking (non-smoker, ex-smoker, and current smoker) and alcohol consumption [none, moderate consumption ( $\leq 2$  standard drinks for men and  $\leq 1$  standard drink for women per single session), and heavy consumption (more than moderate)]. Places of residence (rural or urban), and the urban region was the capital region and 7 metropolitan cities, and the other regions were categorized as rural area.

##### ***Variables representing the severity of MetS***

The severity of MetS as a covariate was defined, as the metabolic burden can be diverse even within a study subgroup, according to the following two aspects: the number of MetS components present and the actual measured values of the components included in the MetS criteria. The two aspects were complementary because the number of preexisting MetS components could not reflect the continuous information (e.g., high glucose values) pertaining to each MetS parameter, and the actual values of the MetS parameters could be affected by medications.

## Data S2.

### Details regarding the adjustment variables for multivariable analyses.

Continuous variables are presented as the mean values (standard deviations), and categorical variables are presented as numbers (percentages).

In the first analysis, comparing the risk of MACEs or all-cause mortality in each study subgroup divided according to the dynamic MetS status and frequency of MV-PA, the MetS-free group with 0 days/week of self-reported MV-PA was the reference group. As the other clinical characteristics would be distinct in each subgroup (e.g., a higher body mass index in the MetS-chronic group or a lower comorbidity burden in the MetS-free group), the multivariable model in the first analysis was adjusted for baseline age, sex, eGFR (continuous, mL/min/1.73 m<sup>2</sup>), alanine aminotransferase (continuous, IU/mL), aspartate aminotransferase (continuous, IU/mL), hemoglobin (continuous, g/dL), low-income status (the lowest quartile in the nation), body mass index (continuous, kg/m<sup>2</sup>), Charlson Comorbidity Index score, and place of residence (urban or rural). The results comparing the MetS subgroups in detail have been reported in our previous study,<sup>1</sup> with further consideration of other important potential confounders.

In the second analysis, the association between the frequency of MV-PA and the risk of MACE or all-cause mortality in each MetS subgroup was assessed, with those who did not engage in MV-PA in each subgroup serving as the reference group. The main purpose of this analysis was to assess whether MV-PA was related to a lower MACE or all-cause mortality risk in those with similar clinical and metabolic status. Therefore, additional clinical variables were used to adjust the models, including the MetS severity. The model was adjusted for age, sex, baseline eGFR (continuous, mL/min/1.73 m<sup>2</sup>), alanine aminotransferase (continuous, IU/mL), aspartate aminotransferase (continuous, IU/mL), hemoglobin (continuous, g/dL), low-income status (the lowest quartile in the nation), body mass index, Charlson Comorbidity Index score, place of residence, and MetS severity. The MetS severity was determined as the number of MetS components or the actual values of the MetS components. In addition, as smoking or alcohol consumption behaviors might also confound the association, the lifestyle variables were additionally adjusted in a model. Further subgroup analyses were performed, and the

subgroups were divided according to age (20-39, 40-64,  $\geq 65$  years old) or sex (male or female). Additional subgroup analysis was performed for the initially excluded subjects due to their fluctuating/transient MetS status (N = 1,544,500). Those who had impaired kidney function or previous MACE history were again not considered in the subgroup analysis, yielding 1,297,589 subjects with transient/fluctuating MetS status in the analysis. The multivariable results for the subgroup analyses were adjusted for age, sex, baseline eGFR (continuous, mL/min/1.73 m<sup>2</sup>), alanine aminotransferase (continuous, IU/mL), aspartate aminotransferase (continuous, IU/mL), hemoglobin (continuous, g/dL), low-income status (the lowest quartile in the nation), body mass index (continuous, kg/m<sup>2</sup>), Charlson Comorbidity Index score, place of residence (urban or rural), and the number of MetS components at the baseline health screening.

In the third analysis, we divided the study population according to whether they had a consistently absent (absence in S1, S2, and S3) or present (presence in S1, S2, and S3) states of individual MetS components (central obesity, high blood pressure, impaired glucose tolerance, high triglyceride, low high-density lipoprotein cholesterol). The purpose of this analysis was to additionally test the significance of MV-PA for each MetS component, as MetS is a cluster of 5 risk components and the significance of MV-PA may vary according to the components. In the analysis, those who were initially excluded due to their fluctuating/transient status of MetS were included, and the dynamic status of each MetS component was re-assessed. The unadjusted and age-/sex-adjusted models were first constructed. In addition, a multivariable model adjusted for age, sex, baseline eGFR (continuous, mL/min/1.73 m<sup>2</sup>), alanine aminotransferase (continuous, IU/mL), aspartate aminotransferase (continuous, IU/mL), hemoglobin (continuous, g/dL), low-income status (the lowest quartile in the nation), body mass index, Charlson Comorbidity Index score, place of residences (urban or rural), MetS severity represented by the number of MetS components, and other lifestyle variables (smoking status and alcohol consumption behavior) was presented. Those who developed a component or recovered from a previous presence of a MetS component were not separately analyzed, as the total number of persons and outcomes in each subgroup was small when we divided subgroups in this manner.

**Table S1. Risks of acute myocardial infarction according to frequency of moderate-to-vigorous physical activity and dynamic metabolic syndrome status.**

| MetS status    | Frequency of MV-PA | Number of persons | Number of acute MI | Follow-up (person-years) | Incidence rate (/1000 person-years) | Unadjusted model |         | Multivariable model   |         |
|----------------|--------------------|-------------------|--------------------|--------------------------|-------------------------------------|------------------|---------|-----------------------|---------|
|                |                    |                   |                    |                          |                                     | IRR (95% CI)     | P       | Adjusted IRR (95% CI) | P       |
| MetS-free      | 0 days/week        | 1,840,026         | 5,521              | 7,981,116                | 0.69                                | Reference        |         | Reference             |         |
|                | 1-2 days/week      | 1,531,152         | 3,086              | 6,878,663                | 0.45                                | 0.65 (0.62-0.68) | < 0.001 | 0.81 (0.78-0.85)      | < 0.001 |
|                | 3-4 days/week      | 756,270           | 1,700              | 3,367,586                | 0.50                                | 0.73 (0.69-0.77) | < 0.001 | 0.77 (0.72-0.81)      | < 0.001 |
|                | ≥5 days/week       | 420,090           | 1,234              | 1,825,140                | 0.68                                | 0.98 (0.92-1.04) | 0.468   | 0.81 (0.76-0.87)      | < 0.001 |
| MetS-recovery  | 0 days/week        | 145,047           | 969                | 610,910                  | 1.59                                | 2.29 (2.14-2.45) | < 0.001 | 1.43 (1.34-1.53)      | < 0.001 |
|                | 1-2 days/week      | 104,911           | 474                | 468,051                  | 1.01                                | 1.46 (1.33-1.61) | < 0.001 | 1.24 (1.13-1.36)      | < 0.001 |
|                | 3-4 days/week      | 59,716            | 278                | 262,637                  | 1.06                                | 1.53 (1.36-1.73) | < 0.001 | 1.12 (0.99-1.26)      | 0.067   |
|                | ≥5 days/week       | 38,639            | 217                | 163,687                  | 1.33                                | 1.92 (1.67-2.19) | < 0.001 | 1.11 (0.97-1.28)      | 0.123   |
| MetS-developed | 0 days/week        | 156,540           | 1,264              | 634,582                  | 1.99                                | 2.88 (2.71-3.06) | < 0.001 | 1.50 (1.41-1.60)      | < 0.001 |
|                | 1-2 days/week      | 101,511           | 566                | 436,851                  | 1.30                                | 1.87 (1.72-2.04) | < 0.001 | 1.35 (1.24-1.47)      | < 0.001 |
|                | 3-4 days/week      | 54,830            | 338                | 231,489                  | 1.46                                | 2.11 (1.89-2.36) | < 0.001 | 1.24 (1.11-1.39)      | < 0.001 |
|                | ≥5 days/week       | 35,282            | 248                | 143,535                  | 1.73                                | 2.5 (2.20-2.84)  | < 0.001 | 1.17 (1.03-1.32)      | 0.019   |
| MetS-chronic   | 0 days/week        | 406,137           | 4,088              | 1,624,864                | 2.52                                | 3.64 (3.49-3.79) | < 0.001 | 1.51 (1.44-1.58)      | < 0.001 |
|                | 1-2 days/week      | 225,524           | 1,871              | 965,660                  | 1.94                                | 2.80 (2.66-2.95) | < 0.001 | 1.59 (1.51-1.68)      | < 0.001 |
|                | 3-4 days/week      | 136,733           | 1,051              | 572,285                  | 1.84                                | 2.65 (2.49-2.84) | < 0.001 | 1.26 (1.18-1.35)      | < 0.001 |
|                | ≥5 days/week       | 95,669            | 811                | 384,604                  | 2.11                                | 3.05 (2.83-3.28) | < 0.001 | 1.18 (1.09-1.27)      | < 0.001 |

MetS = metabolic syndrome, MV-PA, moderate-to-vigorous physical activity, MI = myocardial infarction, IRR = incidence rate ratio, CI = confidence interval  
The multivariable model was adjusted for age, sex, baseline eGFR (continuous, mL/min/1.73 m<sup>2</sup>), alanine aminotransferase (continuous, IU/mL), aspartate aminotransferase (continuous, IU/mL), hemoglobin (continuous, g/dL), low-income status (the lowest quartile in the nation), body mass index (continuous, kg/m<sup>2</sup>), Charlson Comorbidity Index score, and place of residence (urban or rural).

**Table S2. Risks of revascularization according to frequency of moderate-to-vigorous physical activity and dynamic metabolic syndrome status.**

| MetS status    | Frequency of MV-PA | Number of persons | Number of revascularization | Follow-up (person-years) | Incidence rate (/1000 person-years) | Unadjusted model |         | Multivariable model   |         |
|----------------|--------------------|-------------------|-----------------------------|--------------------------|-------------------------------------|------------------|---------|-----------------------|---------|
|                |                    |                   |                             |                          |                                     | IRR (95% CI)     | P       | Adjusted IRR (95% CI) | P       |
| MetS-free      | 0 days/week        | 1,840,026         | 4,257                       | 7,981,116                | 0.53                                | Reference        |         | Reference             |         |
|                | 1-2 days/week      | 1,531,152         | 2,702                       | 6,878,663                | 0.39                                | 0.74 (0.70-0.77) | < 0.001 | 0.91 (0.87-0.96)      | < 0.001 |
|                | 3-4 days/week      | 756,270           | 1,618                       | 3,367,586                | 0.48                                | 0.90 (0.85-0.95) | < 0.001 | 0.92 (0.86-0.97)      | 0.003   |
|                | ≥5 days/week       | 420,090           | 1,198                       | 1,825,140                | 0.66                                | 1.23 (1.15-1.31) | < 0.001 | 0.95 (0.89-1.02)      | 0.137   |
| MetS-recovery  | 0 days/week        | 145,047           | 936                         | 610,910                  | 1.53                                | 2.87 (2.68-3.08) | < 0.001 | 1.71 (1.59-1.83)      | < 0.001 |
|                | 1-2 days/week      | 104,911           | 525                         | 468,051                  | 1.12                                | 2.10 (1.92-2.30) | < 0.001 | 1.62 (1.48-1.78)      | < 0.001 |
|                | 3-4 days/week      | 59,716            | 320                         | 262,637                  | 1.22                                | 2.28 (2.04-2.56) | < 0.001 | 1.51 (1.35-1.69)      | < 0.001 |
|                | ≥5 days/week       | 38,639            | 266                         | 163,687                  | 1.63                                | 3.05 (2.69-3.45) | < 0.001 | 1.56 (1.38-1.76)      | < 0.001 |
| MetS-developed | 0 days/week        | 156,540           | 1,303                       | 634,582                  | 2.05                                | 3.85 (3.62-4.10) | < 0.001 | 1.97 (1.85-2.10)      | < 0.001 |
|                | 1-2 days/week      | 101,511           | 756                         | 436,851                  | 1.73                                | 3.24 (3.00-3.51) | < 0.001 | 2.16 (1.99-2.33)      | < 0.001 |
|                | 3-4 days/week      | 54,830            | 440                         | 231,489                  | 1.90                                | 3.56 (3.23-3.93) | < 0.001 | 1.93 (1.75-2.13)      | < 0.001 |
|                | ≥5 days/week       | 35,282            | 338                         | 143,535                  | 2.35                                | 4.41 (3.95-4.93) | < 0.001 | 1.86 (1.67-2.08)      | < 0.001 |
| MetS-chronic   | 0 days/week        | 406,137           | 5,127                       | 1,624,864                | 3.16                                | 5.92 (5.68-6.16) | < 0.001 | 2.50 (2.39-2.61)      | < 0.001 |
|                | 1-2 days/week      | 225,524           | 2,613                       | 965,660                  | 2.71                                | 5.07 (4.83-5.33) | < 0.001 | 2.67 (2.53-2.81)      | < 0.001 |
|                | 3-4 days/week      | 136,733           | 1,626                       | 572,285                  | 2.84                                | 5.33 (5.03-5.64) | < 0.001 | 2.35 (2.22-2.50)      | < 0.001 |
|                | ≥5 days/week       | 95,669            | 1,281                       | 384,604                  | 3.33                                | 6.24 (5.87-6.65) | < 0.001 | 2.21 (2.07-2.36)      | < 0.001 |

MetS = metabolic syndrome, MV-PA, moderate-to-vigorous physical activity, IRR = incidence rate ratio, CI = confidence interval

The multivariable model was adjusted for age, sex, baseline eGFR (continuous, mL/min/1.73 m<sup>2</sup>), alanine aminotransferase (continuous, IU/mL), aspartate aminotransferase (continuous, IU/mL), hemoglobin (continuous, g/dL), low-income status (the lowest quartile in the nation), body mass index (continuous, kg/m<sup>2</sup>), Charlson Comorbidity Index score, and place of residence (urban or rural).

**Table S3. Risks of acute ischemic stroke according to frequency of moderate-to-vigorous physical activity and dynamic metabolic syndrome status.**

| MetS status    | Frequency of MV-PA | Number of persons | Number of acute ischemic stroke | Follow-up (person-years) | Incidence rate (/1000 person-years) | Unadjusted model |         | Multivariable model   |         |
|----------------|--------------------|-------------------|---------------------------------|--------------------------|-------------------------------------|------------------|---------|-----------------------|---------|
|                |                    |                   |                                 |                          |                                     | IRR (95% CI)     | P       | Adjusted IRR (95% CI) | P       |
| MetS-free      | 0 days/week        | 1,840,026         | 9,414                           | 7,981,116                | 1.18                                | Reference        |         | Reference             |         |
|                | 1-2 days/week      | 1,531,152         | 4,353                           | 6,878,663                | 0.63                                | 0.54 (0.52-0.56) | < 0.001 | 0.83 (0.80-0.87)      | < 0.001 |
|                | 3-4 days/week      | 756,270           | 2,605                           | 3,367,586                | 0.77                                | 0.66 (0.63-0.68) | < 0.001 | 0.78 (0.75-0.81)      | < 0.001 |
|                | ≥5 days/week       | 420,090           | 2,093                           | 1,825,140                | 1.15                                | 0.97 (0.93-1.02) | 0.244   | 0.81 (0.77-0.85)      | < 0.001 |
| MetS-recovery  | 0 days/week        | 145,047           | 1,748                           | 610,910                  | 2.86                                | 2.43 (2.31-2.55) | < 0.001 | 1.32 (1.26-1.39)      | < 0.001 |
|                | 1-2 days/week      | 104,911           | 678                             | 468,051                  | 1.45                                | 1.23 (1.14-1.33) | < 0.001 | 1.15 (1.06-1.24)      | < 0.001 |
|                | 3-4 days/week      | 59,716            | 438                             | 262,637                  | 1.67                                | 1.41 (1.28-1.56) | < 0.001 | 1.06 (0.97-1.17)      | 0.199   |
|                | ≥5 days/week       | 38,639            | 397                             | 163,687                  | 2.43                                | 2.06 (1.86-2.27) | < 0.001 | 1.09 (0.99-1.21)      | 0.082   |
| MetS-developed | 0 days/week        | 156,540           | 2,339                           | 634,582                  | 3.69                                | 3.12 (2.99-3.27) | < 0.001 | 1.34 (1.28-1.41)      | < 0.001 |
|                | 1-2 days/week      | 101,511           | 837                             | 436,851                  | 1.92                                | 1.62 (1.51-1.74) | < 0.001 | 1.22 (1.14-1.31)      | < 0.001 |
|                | 3-4 days/week      | 54,830            | 489                             | 231,489                  | 2.11                                | 1.79 (1.64-1.96) | < 0.001 | 1.00 (0.92-1.10)      | 0.933   |
|                | ≥5 days/week       | 35,282            | 454                             | 143,535                  | 3.16                                | 2.68 (2.44-2.95) | < 0.001 | 1.07 (0.97-1.17)      | 0.176   |
| MetS-chronic   | 0 days/week        | 406,137           | 8,274                           | 1,624,864                | 5.09                                | 4.32 (4.19-4.45) | < 0.001 | 1.39 (1.34-1.44)      | < 0.001 |
|                | 1-2 days/week      | 225,524           | 2,688                           | 965,660                  | 2.78                                | 2.36 (2.26-2.46) | < 0.001 | 1.29 (1.24-1.35)      | < 0.001 |
|                | 3-4 days/week      | 136,733           | 1,791                           | 572,285                  | 3.13                                | 2.65 (2.52-2.79) | < 0.001 | 1.12 (1.07-1.18)      | < 0.001 |
|                | ≥5 days/week       | 95,669            | 1,528                           | 384,604                  | 3.97                                | 3.37 (3.19-3.56) | < 0.001 | 1.06 (1.00-1.12)      | 0.054   |

MetS = metabolic syndrome, MV-PA, moderate-to-vigorous physical activity, IRR = incidence rate ratio, CI = confidence interval

The multivariable model was adjusted for age, sex, baseline eGFR (continuous, mL/min/1.73 m<sup>2</sup>), alanine aminotransferase (continuous, IU/mL), aspartate aminotransferase (continuous, IU/mL), hemoglobin (continuous, g/dL), low-income status (the lowest quartile in the nation), body mass index (continuous, kg/m<sup>2</sup>), Charlson Comorbidity Index score, and place of residence (urban or rural).

**Table S4. Risks of major adverse cardiovascular events according to the frequency of moderate-to-vigorous physical activity in each study group within subjects with age 20-39 years old.**

| MetS status    | Frequency of MV-PA | Number of persons | Number of MACE | Follow-up (person-years) | Incidence rate (/1000 person-years) | Unadjusted model |      | Multivariable model   |      |
|----------------|--------------------|-------------------|----------------|--------------------------|-------------------------------------|------------------|------|-----------------------|------|
|                |                    |                   |                |                          |                                     | IRR (95% CI)     | P    | Adjusted IRR (95% CI) | P    |
| MetS-free      | 0 days/week        | 703,712           | 1,012          | 3,216,593                | 0.31                                | Reference        |      | Reference             |      |
|                | 1-2 days/week      | 714,886           | 1,101          | 3,306,908                | 0.33                                | 1.06 (0.97-1.15) | 0.19 | 1.01 (0.93-1.1)       | 0.82 |
|                | 3-4 days/week      | 275,702           | 428            | 1,284,732                | 0.33                                | 1.06 (0.95-1.19) | 0.32 | 1.02 (0.91-1.14)      | 0.78 |
|                | ≥5 days/week       | 121,386           | 176            | 565,971                  | 0.31                                | 0.99 (0.84-1.16) | 0.89 | 0.96 (0.82-1.13)      | 0.63 |
| MetS-recovery  | 0 days/week        | 25,987            | 82             | 120,679                  | 0.68                                | Reference        |      | Reference             |      |
|                | 1-2 days/week      | 30,272            | 97             | 142,395                  | 0.68                                | 1 (0.75-1.35)    | 0.99 | 0.96 (0.72-1.3)       | 0.81 |
|                | 3-4 days/week      | 12,780            | 54             | 60,557                   | 0.89                                | 1.31 (0.93-1.85) | 0.12 | 1.33 (0.94-1.89)      | 0.10 |
|                | ≥5 days/week       | 5,936             | 21             | 27,984                   | 0.75                                | 1.1 (0.68-1.78)  | 0.69 | 1.18 (0.73-1.91)      | 0.51 |
| MetS-developed | 0 days/week        | 20,426            | 98             | 92,136                   | 1.06                                | Reference        |      | Reference             |      |
|                | 1-2 days/week      | 24,477            | 119            | 111,780                  | 1.06                                | 1 (0.77-1.31)    | 0.99 | 0.99 (0.76-1.3)       | 0.96 |
|                | 3-4 days/week      | 8,175             | 41             | 37,771                   | 1.09                                | 1.02 (0.71-1.47) | 0.91 | 1.04 (0.72-1.51)      | 0.82 |
|                | ≥5 days/week       | 3,102             | 18             | 14,372                   | 1.25                                | 1.18 (0.71-1.95) | 0.52 | 1.24 (0.75-2.06)      | 0.40 |
| MetS-chronic   | 0 days/week        | 28,739            | 206            | 131,534                  | 1.57                                | Reference        |      | Reference             |      |
|                | 1-2 days/week      | 36,795            | 274            | 170,383                  | 1.61                                | 1.03 (0.86-1.23) | 0.77 | 1.02 (0.85-1.22)      | 0.87 |
|                | 3-4 days/week      | 13,024            | 102            | 61,088                   | 1.67                                | 1.07 (0.84-1.35) | 0.60 | 1.03 (0.81-1.32)      | 0.78 |
|                | ≥5 days/week       | 4,989             | 40             | 23,282                   | 1.72                                | 1.1 (0.78-1.54)  | 0.59 | 1.09 (0.78-1.54)      | 0.61 |

MetS = metabolic syndrome, MV-PA, moderate-to-vigorous physical activity, IRR = incidence rate ratio, CI = confidence interval

Multivariable model was adjusted for age, sex, baseline eGFR (continuous, mL/min/1.73 m<sup>2</sup>), alanine aminotransferase (continuous, IU/mL), aspartate aminotransferase (continuous, IU/mL), hemoglobin (continuous, g/dL), low-income status (the lowest quartile in the nation), body mass index (continuous, kg/m<sup>2</sup>), Charlson Comorbidity Index score, place of residence (urban or rural), and the number of MetS components at the baseline health screening.



**Table S5. Risks of major adverse cardiovascular events according to the frequency of moderate-to-vigorous physical activity in each study group within subjects with age 40-64 years old.**

| MetS status    | Frequency of MV-PA | Number of persons | Number of MACE | Follow-up (person-years) | Incidence rate (/1000 person-years) | Unadjusted model |         | Multivariable model   |         |
|----------------|--------------------|-------------------|----------------|--------------------------|-------------------------------------|------------------|---------|-----------------------|---------|
|                |                    |                   |                |                          |                                     | IRR (95% CI)     | P       | Adjusted IRR (95% CI) | P       |
| MetS-free      | 0 days/week        | 976,905           | 8,871          | 4,163,437                | 2.13                                | Reference        |         | Reference             |         |
|                | 1-2 days/week      | 770,823           | 6,169          | 3,396,451                | 1.82                                | 0.85 (0.83-0.88) | < 0.001 | 0.92 (0.89-0.95)      | < 0.001 |
|                | 3-4 days/week      | 439,019           | 3,468          | 1,922,719                | 1.80                                | 0.85 (0.81-0.88) | < 0.001 | 0.84 (0.8-0.87)       | < 0.001 |
|                | ≥5 days/week       | 252,297           | 2,232          | 1,083,420                | 2.06                                | 0.97 (0.92-1.01) | 0.16    | 0.86 (0.82-0.9)       | < 0.001 |
| MetS-recovery  | 0 days/week        | 90,232            | 1,594          | 382,771                  | 4.16                                | Reference        |         | Reference             |         |
|                | 1-2 days/week      | 67,267            | 955            | 297,656                  | 3.21                                | 0.77 (0.71-0.83) | < 0.001 | 0.83 (0.76-0.9)       | < 0.001 |
|                | 3-4 days/week      | 40,246            | 587            | 176,549                  | 3.32                                | 0.8 (0.73-0.88)  | < 0.001 | 0.8 (0.73-0.88)       | < 0.001 |
|                | ≥5 days/week       | 25,033            | 406            | 106,888                  | 3.80                                | 0.91 (0.82-1.02) | 0.10    | 0.83 (0.74-0.93)      | < 0.001 |
| MetS-developed | 0 days/week        | 96,352            | 1,988          | 395,779                  | 5.02                                | Reference        |         | Reference             |         |
|                | 1-2 days/week      | 67,144            | 1,211          | 288,122                  | 4.20                                | 0.84 (0.78-0.9)  | < 0.001 | 0.87 (0.81-0.94)      | < 0.001 |
|                | 3-4 days/week      | 37,707            | 680            | 160,224                  | 4.24                                | 0.84 (0.77-0.92) | < 0.001 | 0.83 (0.76-0.9)       | < 0.001 |
|                | ≥5 days/week       | 22,755            | 466            | 94,298                   | 4.94                                | 0.98 (0.89-1.09) | 0.75    | 0.89 (0.8-0.98)       | 0.02    |
| MetS-chronic   | 0 days/week        | 236,590           | 6,630          | 975,632                  | 6.80                                | Reference        |         | Reference             |         |
|                | 1-2 days/week      | 155,107           | 3,921          | 670,350                  | 5.85                                | 0.86 (0.83-0.9)  | < 0.001 | 0.9 (0.87-0.94)       | < 0.001 |
|                | 3-4 days/week      | 92,355            | 2,283          | 394,689                  | 5.78                                | 0.85 (0.81-0.89) | < 0.001 | 0.83 (0.79-0.87)      | < 0.001 |
|                | ≥5 days/week       | 57,905            | 1,459          | 240,775                  | 6.06                                | 0.89 (0.84-0.94) | < 0.001 | 0.82 (0.78-0.87)      | < 0.001 |

MetS = metabolic syndrome, MV-PA, moderate-to-vigorous physical activity, IRR = incidence rate ratio, CI = confidence interval

Multivariable model was adjusted for age, sex, baseline eGFR (continuous, mL/min/1.73 m<sup>2</sup>), alanine aminotransferase (continuous, IU/mL), aspartate aminotransferase (continuous, IU/mL), hemoglobin (continuous, g/dL), low-income status (the lowest quartile in the nation), body mass index (continuous, kg/m<sup>2</sup>), Charlson Comorbidity Index score, place of residence (urban or rural), and the number of MetS components at the baseline health screening.

**Table S6. Risks of major adverse cardiovascular events according to the frequency of moderate-to-vigorous physical activity in each study group within subjects with age  $\geq$  65 years old.**

| MetS status    | Frequency of MV-PA | Number of persons | Number of MACE | Follow-up (person-years) | Incidence rate (/1000 person-years) | Unadjusted model |         | Multivariable model   |         |
|----------------|--------------------|-------------------|----------------|--------------------------|-------------------------------------|------------------|---------|-----------------------|---------|
|                |                    |                   |                |                          |                                     | IRR (95% CI)     | P       | Adjusted IRR (95% CI) | P       |
| MetS-free      | 0 days/week        | 159,409           | 7,354          | 601,086                  | 12.23                               | Reference        |         | Reference             |         |
|                | 1-2 days/week      | 45,443            | 1,683          | 175,303                  | 9.60                                | 0.78 (0.74-0.83) | < 0.001 | 0.86 (0.82-0.91)      | < 0.001 |
|                | 3-4 days/week      | 41,549            | 1,330          | 160,135                  | 8.31                                | 0.68 (0.64-0.72) | < 0.001 | 0.76 (0.71-0.8)       | < 0.001 |
|                | $\geq$ 5 days/week | 46,407            | 1,619          | 175,750                  | 9.21                                | 0.75 (0.71-0.79) | < 0.001 | 0.77 (0.73-0.81)      | < 0.001 |
| MetS-recovery  | 0 days/week        | 28,828            | 1,546          | 107,460                  | 14.39                               | Reference        |         | Reference             |         |
|                | 1-2 days/week      | 7,372             | 371            | 28,000                   | 13.25                               | 0.92 (0.82-1.03) | 0.15    | 0.95 (0.84-1.06)      | 0.34    |
|                | 3-4 days/week      | 6,690             | 269            | 25,531                   | 10.54                               | 0.73 (0.64-0.83) | < 0.001 | 0.78 (0.69-0.89)      | < 0.001 |
|                | $\geq$ 5 days/week | 7,670             | 345            | 28,816                   | 11.97                               | 0.83 (0.74-0.94) | 0.002   | 0.83 (0.73-0.93)      | 0.002   |
| MetS-developed | 0 days/week        | 39,762            | 2,261          | 146,666                  | 15.42                               | Reference        |         | Reference             |         |
|                | 1-2 days/week      | 9,890             | 510            | 36,948                   | 13.80                               | 0.9 (0.81-0.99)  | 0.02    | 0.94 (0.85-1.04)      | 0.21    |
|                | 3-4 days/week      | 8,948             | 363            | 33,494                   | 10.84                               | 0.7 (0.63-0.79)  | < 0.001 | 0.75 (0.67-0.83)      | < 0.001 |
|                | $\geq$ 5 days/week | 9,425             | 438            | 34,865                   | 12.56                               | 0.81 (0.74-0.9)  | < 0.001 | 0.81 (0.73-0.9)       | < 0.001 |
| MetS-chronic   | 0 days/week        | 140,808           | 8,789          | 517,698                  | 16.98                               | Reference        |         | Reference             |         |
|                | 1-2 days/week      | 33,622            | 1,901          | 124,928                  | 15.22                               | 0.9 (0.85-0.94)  | < 0.001 | 0.93 (0.89-0.98)      | 0.006   |
|                | 3-4 days/week      | 31,354            | 1,482          | 116,507                  | 12.72                               | 0.75 (0.71-0.79) | < 0.001 | 0.79 (0.75-0.84)      | < 0.001 |
|                | $\geq$ 5 days/week | 32,775            | 1,720          | 120,548                  | 14.27                               | 0.84 (0.8-0.89)  | < 0.001 | 0.84 (0.79-0.88)      | < 0.001 |

MetS = metabolic syndrome, MV-PA, moderate-to-vigorous physical activity, IRR = incidence rate ratio, CI = confidence interval

Multivariable model was adjusted for age, sex, baseline eGFR (continuous, mL/min/1.73 m<sup>2</sup>), alanine aminotransferase (continuous, IU/mL), aspartate aminotransferase (continuous, IU/mL), hemoglobin (continuous, g/dL), low-income status (the lowest quartile in the nation), body mass index (continuous, kg/m<sup>2</sup>), Charlson Comorbidity Index score, place of residence (urban or rural), and the number of MetS components at the baseline health screening.

**Table S7. Risks of all-cause mortality according to the frequency of moderate-to-vigorous physical activity in each study group within subjects with age 20-39 years old.**

| MetS status    | Frequency of MV-PA | Number of persons | Number of deaths | Follow-up (person-years) | Incidence rate (/1000 person-years) | Unadjusted model |       | Multivariable model   |       |
|----------------|--------------------|-------------------|------------------|--------------------------|-------------------------------------|------------------|-------|-----------------------|-------|
|                |                    |                   |                  |                          |                                     | IRR (95% CI)     | P     | Adjusted IRR (95% CI) | P     |
| MetS-free      | 0 days/week        | 703,712           | 1,236            | 3,218,583                | 0.38                                | Reference        |       | Reference             |       |
|                | 1-2 days/week      | 714,886           | 1,154            | 3,309,093                | 0.35                                | 0.91 (0.84-0.98) | 0.02  | 0.88 (0.81-0.95)      | 0.001 |
|                | 3-4 days/week      | 275,702           | 494              | 1,285,576                | 0.38                                | 1.00 (0.90-1.11) | 0.98  | 0.94 (0.85-1.05)      | 0.28  |
|                | ≥5 days/week       | 121,386           | 240              | 566,333                  | 0.42                                | 1.10 (0.96-1.27) | 0.16  | 1.01 (0.88-1.17)      | 0.84  |
| MetS-recovery  | 0 days/week        | 25,987            | 51               | 120,847                  | 0.42                                | Reference        |       | Reference             |       |
|                | 1-2 days/week      | 30,272            | 57               | 142,574                  | 0.40                                | 0.95 (0.65-1.38) | 0.78  | 0.92 (0.63-1.35)      | 0.68  |
|                | 3-4 days/week      | 12,780            | 25               | 60,635                   | 0.41                                | 0.98 (0.61-1.58) | 0.92  | 0.98 (0.61-1.59)      | 0.94  |
|                | ≥5 days/week       | 5,936             | 17               | 28,025                   | 0.61                                | 1.44 (0.83-2.49) | 0.20  | 1.45 (0.83-2.52)      | 0.19  |
| MetS-developed | 0 days/week        | 20,426            | 70               | 92,333                   | 0.76                                | Reference        |       | Reference             |       |
|                | 1-2 days/week      | 24,477            | 72               | 112,013                  | 0.64                                | 0.85 (0.61-1.18) | 0.33  | 0.83 (0.6-1.15)       | 0.27  |
|                | 3-4 days/week      | 8,175             | 27               | 37,838                   | 0.71                                | 0.94 (0.60-1.47) | 0.790 | 0.85 (0.54-1.33)      | 0.48  |
|                | ≥5 days/week       | 3,102             | 11               | 14,411                   | 0.76                                | 1.01 (0.53-1.90) | 0.98  | 0.85 (0.44-1.66)      | 0.64  |
| MetS-chronic   | 0 days/week        | 28,739            | 89               | 131,946                  | 0.67                                | Reference        |       | Reference             |       |
|                | 1-2 days/week      | 36,795            | 129              | 170,899                  | 0.75                                | 1.12 (0.85-1.47) | 0.41  | 1.10 (0.84-1.45)      | 0.48  |
|                | 3-4 days/week      | 13,024            | 42               | 61,291                   | 0.69                                | 1.02 (0.70-1.47) | 0.93  | 0.92 (0.63-1.34)      | 0.68  |
|                | ≥5 days/week       | 4,989             | 16               | 23,357                   | 0.69                                | 1.02 (0.60-1.73) | 0.96  | 0.93 (0.55-1.6)       | 0.80  |

MetS = metabolic syndrome, MV-PA, moderate-to-vigorous physical activity, IRR = incidence rate ratio, CI = confidence interval

Multivariable model was adjusted for age, sex, baseline eGFR (continuous, mL/min/1.73 m<sup>2</sup>), alanine aminotransferase (continuous, IU/mL), aspartate aminotransferase (continuous, IU/mL), hemoglobin (continuous, g/dL), low-income status (the lowest quartile in the nation), body mass index (continuous, kg/m<sup>2</sup>), Charlson Comorbidity Index score, place of residence (urban or rural), and the number of MetS components at the baseline health screening.

**Table S8. Risks of all-cause mortality according to the frequency of moderate-to-vigorous physical activity in each study group within subjects with age 40-64 years old.**

| MetS status    | Frequency of MV-PA | Number of persons | Number of deaths | Follow-up (person-years) | Incidence rate (/1000 person-years) | Unadjusted model |         | Multivariable model   |         |
|----------------|--------------------|-------------------|------------------|--------------------------|-------------------------------------|------------------|---------|-----------------------|---------|
|                |                    |                   |                  |                          |                                     | IRR (95% CI)     | P       | Adjusted IRR (95% CI) | P       |
| MetS-free      | 0 days/week        | 976,905           | 6,221            | 4,180,767                | 1.49                                | Reference        |         | Reference             |         |
|                | 1-2 days/week      | 770,823           | 3,934            | 3,408,883                | 1.15                                | 0.78 (0.75-0.81) | < 0.001 | 0.84 (0.80-0.87)      | < 0.001 |
|                | 3-4 days/week      | 439,019           | 2,293            | 1,929,731                | 1.19                                | 0.80 (0.76-0.84) | < 0.001 | 0.80 (0.76-0.84)      | < 0.001 |
|                | ≥5 days/week       | 252,297           | 1,716            | 1,087,843                | 1.58                                | 1.06 (1.00-1.12) | 0.03    | 0.92 (0.88-0.97)      | 0.004   |
| MetS-recovery  | 0 days/week        | 90,232            | 925              | 385,822                  | 2.40                                | Reference        |         | Reference             |         |
|                | 1-2 days/week      | 67,267            | 480              | 299,547                  | 1.60                                | 0.67 (0.60-0.75) | < 0.001 | 0.73 (0.65-0.82)      | < 0.001 |
|                | 3-4 days/week      | 40,246            | 279              | 177,731                  | 1.57                                | 0.65 (0.57-0.75) | < 0.001 | 0.68 (0.59-0.77)      | < 0.001 |
|                | ≥5 days/week       | 25,033            | 223              | 107,725                  | 2.07                                | 0.86 (0.75-1.00) | 0.049   | 0.77 (0.67-0.90)      | < 0.001 |
| MetS-developed | 0 days/week        | 96,352            | 899              | 399,819                  | 2.25                                | Reference        |         | Reference             |         |
|                | 1-2 days/week      | 67,144            | 549              | 290,656                  | 1.89                                | 0.84 (0.76-0.93) | 0.001   | 0.89 (0.80-0.99)      | 0.03    |
|                | 3-4 days/week      | 37,707            | 299              | 161,619                  | 1.85                                | 0.82 (0.72-0.94) | 0.003   | 0.77 (0.67-0.87)      | < 0.001 |
|                | ≥5 days/week       | 22,755            | 219              | 95,233                   | 2.30                                | 1.02 (0.88-1.19) | 0.77    | 0.84 (0.72-0.98)      | 0.023   |
| MetS-chronic   | 0 days/week        | 236,590           | 2,496            | 989,194                  | 2.52                                | Reference        |         | Reference             |         |
|                | 1-2 days/week      | 155,107           | 1,289            | 678,683                  | 1.90                                | 0.75 (0.70-0.81) | < 0.001 | 0.78 (0.73-0.84)      | < 0.001 |
|                | 3-4 days/week      | 92,355            | 867              | 399,493                  | 2.17                                | 0.86 (0.80-0.93) | < 0.001 | 0.80 (0.74-0.86)      | < 0.001 |
|                | ≥5 days/week       | 57,905            | 624              | 243,869                  | 2.56                                | 1.01 (0.93-1.11) | 0.76    | 0.87 (0.80-0.95)      | 0.002   |

MetS = metabolic syndrome, MV-PA, moderate-to-vigorous physical activity, IRR = incidence rate ratio, CI = confidence interval

Multivariable model was adjusted for age, sex, baseline eGFR (continuous, mL/min/1.73 m<sup>2</sup>), alanine aminotransferase (continuous, IU/mL), aspartate aminotransferase (continuous, IU/mL), hemoglobin (continuous, g/dL), low-income status (the lowest quartile in the nation), body mass index (continuous, kg/m<sup>2</sup>), Charlson Comorbidity Index score, place of residence (urban or rural), and the number of MetS components at the baseline health screening.

**Table S9. Risks of all-cause mortality according to the frequency of moderate-to-vigorous physical activity in each study group within subjects with age  $\geq 65$  years old.**

| MetS status    | Frequency of MV-PA | Number of persons | Number of deaths | Follow-up (person-years) | Incidence rate (/1000 person-years) | Unadjusted model |         | Multivariable model   |         |
|----------------|--------------------|-------------------|------------------|--------------------------|-------------------------------------|------------------|---------|-----------------------|---------|
|                |                    |                   |                  |                          |                                     | IRR (95% CI)     | P       | Adjusted IRR (95% CI) | P       |
| MetS-free      | 0 days/week        | 159,409           | 8,164            | 613,527                  | 13.31                               | Reference        |         | Reference             |         |
|                | 1-2 days/week      | 45,443            | 1,645            | 178,328                  | 9.22                                | 0.69 (0.66-0.73) | < 0.001 | 0.81 (0.77-0.86)      | < 0.001 |
|                | 3-4 days/week      | 41,549            | 1,358            | 162,522                  | 8.36                                | 0.63 (0.59-0.67) | < 0.001 | 0.78 (0.74-0.83)      | < 0.001 |
|                | $\geq 5$ days/week | 46,407            | 1,603            | 178,636                  | 8.97                                | 0.67 (0.64-0.71) | < 0.001 | 0.75 (0.71-0.79)      | < 0.001 |
| MetS-recovery  | 0 days/week        | 28,828            | 1,400            | 110,159                  | 12.71                               | Reference        |         | Reference             |         |
|                | 1-2 days/week      | 7,372             | 223              | 28,662                   | 7.78                                | 0.61 (0.53-0.71) | < 0.001 | 0.67 (0.59-0.78)      | < 0.001 |
|                | 3-4 days/week      | 6,690             | 222              | 26,033                   | 8.53                                | 0.67 (0.58-0.77) | < 0.001 | 0.79 (0.68-0.91)      | 0.001   |
|                | $\geq 5$ days/week | 7,670             | 249              | 29,435                   | 8.46                                | 0.67 (0.58-0.76) | < 0.001 | 0.71 (0.62-0.81)      | < 0.001 |
| MetS-developed | 0 days/week        | 39,762            | 1,498            | 150,598                  | 9.95                                | Reference        |         | Reference             |         |
|                | 1-2 days/week      | 9,890             | 312              | 37,855                   | 8.24                                | 0.83 (0.73-0.94) | 0.003   | 0.9 (0.80-1.02)       | 0.09    |
|                | 3-4 days/week      | 8,948             | 224              | 34,137                   | 6.56                                | 0.66 (0.57-0.76) | < 0.001 | 0.72 (0.62-0.83)      | < 0.001 |
|                | $\geq 5$ days/week | 9,425             | 242              | 35,638                   | 6.79                                | 0.68 (0.60-0.78) | < 0.001 | 0.66 (0.58-0.76)      | < 0.001 |
| MetS-chronic   | 0 days/week        | 140,808           | 5,016            | 533,058                  | 9.41                                | Reference        |         | Reference             |         |
|                | 1-2 days/week      | 33,622            | 950              | 128,396                  | 7.40                                | 0.79 (0.73-0.84) | < 0.001 | 0.82 (0.76-0.88)      | < 0.001 |
|                | 3-4 days/week      | 31,354            | 754              | 119,212                  | 6.32                                | 0.67 (0.62-0.73) | < 0.001 | 0.70 (0.65-0.76)      | < 0.001 |
|                | $\geq 5$ days/week | 32,775            | 937              | 123,595                  | 7.58                                | 0.81 (0.75-0.86) | < 0.001 | 0.76 (0.71-0.82)      | < 0.001 |

MetS = metabolic syndrome, MV-PA, moderate-to-vigorous physical activity, IRR = incidence rate ratio, CI = confidence interval

Multivariable model was adjusted for age, sex, baseline eGFR (continuous, mL/min/1.73 m<sup>2</sup>), alanine aminotransferase (continuous, IU/mL), aspartate aminotransferase (continuous, IU/mL), hemoglobin (continuous, g/dL), low-income status (the lowest quartile in the nation), body mass index (continuous, kg/m<sup>2</sup>), Charlson Comorbidity Index score, place of residence (urban or rural), and the number of MetS components at the baseline health screening.

**Table S10. Risks of major adverse cardiovascular events according to the frequency of moderate-to-vigorous physical activity in each study group within subjects within male subjects.**

| MetS status    | Frequency of MV-PA | Number of persons | Number of MACE | Follow-up (person-years) | Incidence rate (/1000 person-years) | Unadjusted model |         | Multivariable model   |         |
|----------------|--------------------|-------------------|----------------|--------------------------|-------------------------------------|------------------|---------|-----------------------|---------|
|                |                    |                   |                |                          |                                     | IRR (95% CI)     | P       | Adjusted IRR (95% CI) | P       |
| MetS-free      | 0 days/week        | 930,237           | 11,817         | 4,132,793                | 2.86                                | Reference        |         | Reference             |         |
|                | 1-2 days/week      | 968,312           | 6,996          | 4,456,336                | 1.57                                | 0.55 (0.53-0.57) | < 0.001 | 0.92 (0.89-0.95)      | < 0.001 |
|                | 3-4 days/week      | 457,437           | 3,993          | 2,114,502                | 1.89                                | 0.66 (0.64-0.68) | < 0.001 | 0.83 (0.80-0.86)      | < 0.001 |
|                | ≥5 days/week       | 252,775           | 3,118          | 1,135,773                | 2.75                                | 0.96 (0.92-1.00) | 0.04    | 0.82 (0.79-0.85)      | < 0.001 |
| MetS-recovery  | 0 days/week        | 82,818            | 2,093          | 359,770                  | 5.82                                | Reference        |         | Reference             |         |
|                | 1-2 days/week      | 79,227            | 1,126          | 361,219                  | 3.12                                | 0.54 (0.50-0.58) | < 0.001 | 0.84 (0.78-0.91)      | < 0.001 |
|                | 3-4 days/week      | 42,056            | 715            | 191,365                  | 3.74                                | 0.64 (0.59-0.70) | < 0.001 | 0.81 (0.75-0.89)      | < 0.001 |
|                | ≥5 days/week       | 25,752            | 599            | 112,314                  | 5.33                                | 0.92 (0.84-1.00) | 0.06    | 0.83 (0.76-0.91)      | < 0.001 |
| MetS-developed | 0 days/week        | 80,162            | 2,521          | 337,783                  | 7.46                                | Reference        |         | Reference             |         |
|                | 1-2 days/week      | 73,896            | 1,414          | 327,046                  | 4.32                                | 0.58 (0.54-0.62) | < 0.001 | 0.90 (0.84-0.96)      | 0.001   |
|                | 3-4 days/week      | 35,099            | 785            | 155,125                  | 5.06                                | 0.68 (0.63-0.73) | < 0.001 | 0.80 (0.74-0.87)      | < 0.001 |
|                | ≥5 days/week       | 20,448            | 657            | 86,568                   | 7.59                                | 1.02 (0.93-1.11) | 0.70    | 0.86 (0.78-0.93)      | < 0.001 |
| MetS-chronic   | 0 days/week        | 182,679           | 7,615          | 766,556                  | 9.93                                | Reference        |         | Reference             |         |
|                | 1-2 days/week      | 160,057           | 4,438          | 708,105                  | 6.27                                | 0.63 (0.61-0.65) | < 0.001 | 0.92 (0.88-0.95)      | < 0.001 |
|                | 3-4 days/week      | 85,122            | 2,710          | 374,510                  | 7.24                                | 0.73 (0.70-0.76) | < 0.001 | 0.85 (0.81-0.88)      | < 0.001 |
|                | ≥5 days/week       | 52,922            | 2,105          | 221,409                  | 9.51                                | 0.96 (0.91-1.00) | 0.08    | 0.84 (0.80-0.88)      | < 0.001 |

MetS = metabolic syndrome, MV-PA, moderate-to-vigorous physical activity, IRR = incidence rate ratio, CI = confidence interval

Multivariable model was adjusted for age, baseline eGFR (continuous, mL/min/1.73 m<sup>2</sup>), alanine aminotransferase (continuous, IU/mL), aspartate aminotransferase (continuous, IU/mL), hemoglobin (continuous, g/dL), low-income status (the lowest quartile in the nation), body mass index (continuous, kg/m<sup>2</sup>), Charlson Comorbidity Index score, place of residence (urban or rural), and the number of MetS components at the baseline health screening.

**Table S11. Risks of major adverse cardiovascular events according to the frequency of moderate-to-vigorous physical activity in each study group within subjects within female subjects.**

| MetS status    | Frequency of MV-PA | Number of persons | Number of MACE | Follow-up (person-years) | Incidence rate (/1000 person-years) | Unadjusted model |         | Multivariable model   |         |
|----------------|--------------------|-------------------|----------------|--------------------------|-------------------------------------|------------------|---------|-----------------------|---------|
|                |                    |                   |                |                          |                                     | IRR (95% CI)     | P       | Adjusted IRR (95% CI) | P       |
| MetS-free      | 0 days/week        | 909,789           | 5,420          | 3,848,323                | 1.41                                | Reference        |         | Reference             |         |
|                | 1-2 days/week      | 562,840           | 1,957          | 2,422,327                | 0.81                                | 0.57 (0.54-0.60) | < 0.001 | 0.92 (0.87-0.97)      | 0.001   |
|                | 3-4 days/week      | 298,833           | 1,233          | 1,253,084                | 0.98                                | 0.70 (0.66-0.74) | < 0.001 | 0.84 (0.79-0.90)      | < 0.001 |
|                | ≥5 days/week       | 167,315           | 909            | 689,367                  | 1.32                                | 0.94 (0.87-1.00) | 0.07    | 0.85 (0.8-0.92)       | < 0.001 |
| MetS-recovery  | 0 days/week        | 62,229            | 1,129          | 251,140                  | 4.50                                | Reference        |         | Reference             |         |
|                | 1-2 days/week      | 25,684            | 297            | 106,833                  | 2.78                                | 0.62 (0.54-0.70) | < 0.001 | 0.94 (0.83-1.07)      | 0.37    |
|                | 3-4 days/week      | 17,660            | 195            | 71,272                   | 2.74                                | 0.61 (0.52-0.71) | < 0.001 | 0.85 (0.73-0.99)      | 0.04    |
|                | ≥5 days/week       | 12,887            | 173            | 51,373                   | 3.37                                | 0.75 (0.64-0.88) | < 0.001 | 0.86 (0.73-1.01)      | 0.07    |
| MetS-developed | 0 days/week        | 76,378            | 1,826          | 296,799                  | 6.15                                | Reference        |         | Reference             |         |
|                | 1-2 days/week      | 27,615            | 426            | 109,805                  | 3.88                                | 0.63 (0.57-0.70) | < 0.001 | 0.91 (0.82-1.02)      | 0.09    |
|                | 3-4 days/week      | 19,731            | 299            | 76,365                   | 3.92                                | 0.64 (0.56-0.72) | < 0.001 | 0.83 (0.73-0.93)      | 0.002   |
|                | ≥5 days/week       | 14,834            | 265            | 56,968                   | 4.65                                | 0.76 (0.66-0.86) | < 0.001 | 0.86 (0.76-0.98)      | 0.03    |
| MetS-chronic   | 0 days/week        | 223,458           | 8,010          | 858,308                  | 9.33                                | Reference        |         | Reference             |         |
|                | 1-2 days/week      | 65,467            | 1,658          | 257,555                  | 6.44                                | 0.69 (0.65-0.73) | < 0.001 | 0.92 (0.87-0.97)      | 0.002   |
|                | 3-4 days/week      | 51,611            | 1,157          | 197,775                  | 5.85                                | 0.63 (0.59-0.67) | < 0.001 | 0.78 (0.73-0.83)      | < 0.001 |
|                | ≥5 days/week       | 42,747            | 1,114          | 163,195                  | 6.83                                | 0.73 (0.69-0.78) | < 0.001 | 0.83 (0.78-0.89)      | < 0.001 |

MetS = metabolic syndrome, MV-PA, moderate-to-vigorous physical activity, IRR = incidence rate ratio, CI = confidence interval

Multivariable model was adjusted for age, baseline eGFR (continuous, mL/min/1.73 m<sup>2</sup>), alanine aminotransferase (continuous, IU/mL), aspartate aminotransferase (continuous, IU/mL), hemoglobin (continuous, g/dL), low-income status (the lowest quartile in the nation), body mass index (continuous, kg/m<sup>2</sup>), Charlson Comorbidity Index score, place of residence (urban or rural), and the number of MetS components at the baseline health screening.

**Table S12. Risks of all-cause mortality according to the frequency of moderate-to-vigorous physical activity in each study group within subjects within male subjects.**

| MetS status    | Frequency of MV-PA | Number of persons | Number of deaths | Follow-up (person-years) | Incidence rate (/1000 person-years) | Unadjusted model |         | Multivariable model   |         |
|----------------|--------------------|-------------------|------------------|--------------------------|-------------------------------------|------------------|---------|-----------------------|---------|
|                |                    |                   |                  |                          |                                     | IRR (95% CI)     | P       | Adjusted IRR (95% CI) | P       |
| MetS-free      | 0 days/week        | 930,237           | 12,215           | 4,154,926                | 2.94                                | Reference        |         | Reference             |         |
|                | 1-2 days/week      | 968,312           | 5,531            | 4,470,415                | 1.24                                | 0.42 (0.41-0.43) | < 0.001 | 0.80 (0.78-0.83)      | < 0.001 |
|                | 3-4 days/week      | 457,437           | 3,424            | 2,122,554                | 1.61                                | 0.55 (0.53-0.57) | < 0.001 | 0.78 (0.75-0.81)      | < 0.001 |
|                | ≥5 days/week       | 252,775           | 2,970            | 1,141,840                | 2.60                                | 0.88 (0.85-0.92) | < 0.001 | 0.81 (0.78-0.84)      | < 0.001 |
| MetS-recovery  | 0 days/week        | 82,818            | 1,711            | 363,733                  | 4.70                                | Reference        |         | Reference             |         |
|                | 1-2 days/week      | 79,227            | 646              | 363,399                  | 1.78                                | 0.38 (0.35-0.41) | < 0.001 | 0.73 (0.66-0.8)       | < 0.001 |
|                | 3-4 days/week      | 42,056            | 442              | 192,758                  | 2.29                                | 0.49 (0.44-0.54) | < 0.001 | 0.72 (0.65-0.8)       | < 0.001 |
|                | ≥5 days/week       | 25,752            | 418              | 113,520                  | 3.68                                | 0.78 (0.70-0.87) | < 0.001 | 0.76 (0.68-0.85)      | < 0.001 |
| MetS-developed | 0 days/week        | 80,162            | 1,661            | 342,702                  | 4.85                                | Reference        |         | Reference             |         |
|                | 1-2 days/week      | 73,896            | 765              | 329,933                  | 2.32                                | 0.48 (0.44-0.52) | < 0.001 | 0.87 (0.79-0.95)      | 0.002   |
|                | 3-4 days/week      | 35,099            | 445              | 156,708                  | 2.84                                | 0.59 (0.53-0.65) | < 0.001 | 0.73 (0.65-0.81)      | < 0.001 |
|                | ≥5 days/week       | 20,448            | 365              | 87,821                   | 4.16                                | 0.86 (0.77-0.96) | 0.008   | 0.69 (0.62-0.78)      | < 0.001 |
| MetS-chronic   | 0 days/week        | 182,679           | 4,378            | 781,635                  | 5.60                                | Reference        |         | Reference             |         |
|                | 1-2 days/week      | 160,057           | 1,811            | 717,283                  | 2.52                                | 0.45 (0.43-0.48) | < 0.001 | 0.78 (0.74-0.83)      | < 0.001 |
|                | 3-4 days/week      | 85,122            | 1,284            | 380,113                  | 3.38                                | 0.60 (0.57-0.64) | < 0.001 | 0.73 (0.69-0.78)      | < 0.001 |
|                | ≥5 days/week       | 52,922            | 1,163            | 225,588                  | 5.16                                | 0.92 (0.86-0.98) | 0.012   | 0.77 (0.72-0.83)      | < 0.001 |

MetS = metabolic syndrome, MV-PA, moderate-to-vigorous physical activity, IRR = incidence rate ratio, CI = confidence interval

Multivariable model was adjusted for age, baseline eGFR (continuous, mL/min/1.73 m<sup>2</sup>), alanine aminotransferase (continuous, IU/mL), aspartate aminotransferase (continuous, IU/mL), hemoglobin (continuous, g/dL), low-income status (the lowest quartile in the nation), body mass index (continuous, kg/m<sup>2</sup>), Charlson Comorbidity Index score, place of residence (urban or rural), and the number of MetS components at the baseline health screening.



**Table S13. Risks of all-cause mortality according to the frequency of moderate-to-vigorous physical activity in each study group within subjects within female subjects.**

| MetS status    | Frequency of MV-PA | Number of persons | Number of deaths | Follow-up (person-years) | Incidence rate (/1000 person-years) | Unadjusted model |         | Multivariable model   |         |
|----------------|--------------------|-------------------|------------------|--------------------------|-------------------------------------|------------------|---------|-----------------------|---------|
|                |                    |                   |                  |                          |                                     | IRR (95% CI)     | P       | Adjusted IRR (95% CI) | P       |
| MetS-free      | 0 days/week        | 909,789           | 3,406            | 3,857,951                | 0.88                                | Reference        |         | Reference             |         |
|                | 1-2 days/week      | 562,840           | 1,202            | 2,425,889                | 0.50                                | 0.56 (0.53-0.60) | < 0.001 | 0.9 (0.84-0.96)       | 0.003   |
|                | 3-4 days/week      | 298,833           | 721              | 1,255,274                | 0.57                                | 0.65 (0.60-0.70) | < 0.001 | 0.82 (0.76-0.89)      | < 0.001 |
|                | ≥5 days/week       | 167,315           | 589              | 690,973                  | 0.85                                | 0.97 (0.88-1.05) | 0.43    | 0.92 (0.84-1.00)      | 0.06    |
| MetS-recovery  | 0 days/week        | 62,229            | 665              | 253,094                  | 2.63                                | Reference        |         | Reference             |         |
|                | 1-2 days/week      | 25,684            | 114              | 107,384                  | 1.06                                | 0.40 (0.33-0.49) | < 0.001 | 0.68 (0.56-0.83)      | < 0.001 |
|                | 3-4 days/week      | 17,660            | 84               | 71,642                   | 1.17                                | 0.45 (0.36-0.56) | < 0.001 | 0.72 (0.58-0.91)      | 0.006   |
|                | ≥5 days/week       | 12,887            | 71               | 51,665                   | 1.37                                | 0.52 (0.41-0.67) | < 0.001 | 0.69 (0.54-0.88)      | 0.003   |
| MetS-developed | 0 days/week        | 76,378            | 806              | 300,048                  | 2.69                                | Reference        |         | Reference             |         |
|                | 1-2 days/week      | 27,615            | 168              | 110,590                  | 1.52                                | 0.57 (0.48-0.67) | < 0.001 | 0.91 (0.77-1.08)      | 0.28    |
|                | 3-4 days/week      | 19,731            | 105              | 76,885                   | 1.37                                | 0.51 (0.41-0.62) | < 0.001 | 0.74 (0.60-0.90)      | 0.003   |
|                | ≥5 days/week       | 14,834            | 107              | 57,460                   | 1.86                                | 0.69 (0.57-0.85) | < 0.001 | 0.85 (0.69-1.04)      | 0.11    |
| MetS-chronic   | 0 days/week        | 223,458           | 3,223            | 872,563                  | 3.69                                | Reference        |         | Reference             |         |
|                | 1-2 days/week      | 65,467            | 557              | 260,695                  | 2.14                                | 0.58 (0.53-0.63) | < 0.001 | 0.84 (0.77-0.92)      | < 0.001 |
|                | 3-4 days/week      | 51,611            | 379              | 199,884                  | 1.90                                | 0.51 (0.46-0.57) | < 0.001 | 0.72 (0.65-0.80)      | < 0.001 |
|                | ≥5 days/week       | 42,747            | 414              | 165,234                  | 2.51                                | 0.68 (0.61-0.75) | < 0.001 | 0.84 (0.76-0.93)      | < 0.001 |

MetS = metabolic syndrome, MV-PA, moderate-to-vigorous physical activity, IRR = incidence rate ratio, CI = confidence interval

Multivariable model was adjusted for age, sex, baseline eGFR (continuous, mL/min/1.73 m<sup>2</sup>), alanine aminotransferase (continuous, IU/mL), aspartate aminotransferase (continuous, IU/mL), hemoglobin (continuous, g/dL), low-income status (the lowest quartile in the nation), body mass index (continuous, kg/m<sup>2</sup>), Charlson Comorbidity Index score, place of residence (urban or rural), and the number of MetS components at the baseline health screening.

**Table S14. Characteristics of those with undetermined MetS status who were not included in the main analysis.**

| <b>Variables</b>                                      | <b>Undetermined MetS status (N = 1,297,589)</b> |
|-------------------------------------------------------|-------------------------------------------------|
| <b>Clinical and demographic characteristics at S3</b> |                                                 |
| Age (years)                                           | 51.0 ± 12.8                                     |
| Sex (male)                                            | 829,324 (63.9)                                  |
| Height (cm)                                           | 164.9 ± 9.6                                     |
| Weight (kg)                                           | 68.7 ± 12.2                                     |
| BMI (kg/m <sup>2</sup> )                              | 25.1 ± 3.0                                      |
| Low-income status*                                    | 248,855 (19.2)                                  |
| CCI (score)                                           | 0.9 ± 1.2                                       |
| Hemoglobin (g/dL)                                     | 14.4 ± 1.6                                      |
| AST (IU/L)                                            | 27.5 ± 22.6                                     |
| ALT (IU/L)                                            | 29.8 ± 26.9                                     |
| Cr (mg/dL)                                            | 0.89 ± 0.19                                     |
| eGFR (mL/min/1.73 m <sup>2</sup> )                    | 90.1 ± 31.8                                     |
| <b>Self-reported lifestyle (n (%))</b>                |                                                 |
| Moderate-to-vigorous activity                         |                                                 |
| None                                                  | 602,875 (46.5)                                  |
| 1-2 days/wk                                           | 380,888 (29.4)                                  |
| 3-4 days/wk                                           | 189,579 (14.6)                                  |
| ≥ 5 days/wk                                           | 124,247 (9.6)                                   |
| Smoking                                               |                                                 |
| Nonsmoker                                             | 684,976 (52.8)                                  |
| Ex-smoker                                             | 211,688 (16.3)                                  |
| Current light-to-moderate smoker                      | 202,816 (15.6)                                  |
| Current heavy smoker                                  | 198,109 (15.3)                                  |
| Alcohol                                               |                                                 |
| No alcohol intake                                     | 608,088(46.9)                                   |
| Moderate consumption                                  | 58,720(4.5)                                     |
| Heavy consumption                                     | 630,781(48.6)                                   |
| <b>Parameters of MetS</b>                             |                                                 |
| Waist circumference (cm)                              | 84.5 ± 7.8                                      |
| Systolic BP (mmHg)                                    | 126.9 ± 13.4                                    |
| Diastolic BP (mmHg)                                   | 79.2 ± 9.4                                      |
| Glucose (mg/dL)                                       | 101.8 ± 22.4                                    |
| Triglycerides (mg/dL)                                 | 173.2 ± 120.7                                   |
| HDL cholesterol (mg/dL)                               | 50.7 ± 14.5                                     |
| <b>Baseline N of MetS components (n (%))</b>          |                                                 |
| 0                                                     | 41,098 (3.2)                                    |
| 1                                                     | 167,341 (12.9)                                  |
| 2                                                     | 363,965 (28.1)                                  |
| 3                                                     | 536,723 (41.4)                                  |
| 4                                                     | 163,997 (12.6)                                  |
| 5                                                     | 24,465 (1.9)                                    |

AST = aspartate aminotransferase, ALT = alanine aminotransferase, BMI = body mass index, BP = blood pressure, CCI = Charlson Comorbidity Index, Cr = creatinine, eGFR = estimated glomerular filtration rate, HDL = high-density lipoprotein, MetS = metabolic syndrome

There were no missing values in the table.

**Table S15. Risks of major adverse cardiovascular events and all-cause mortality according to the frequency of moderate-to-vigorous physical activity in each study group within those who were excluded due to their undetermined MetS status**

| Outcome             | Frequency of MV-PA | Number of persons | Number of outcomes | Follow-up (person-years) | Incidence rate (/1000 person-years) | Unadjusted model |         | Multivariable model   |         |
|---------------------|--------------------|-------------------|--------------------|--------------------------|-------------------------------------|------------------|---------|-----------------------|---------|
|                     |                    |                   |                    |                          |                                     | IRR (95% CI)     | P       | Adjusted IRR (95% CI) | P       |
| MACE                | 0 days/week        | 561,977           | 13,450             | 2,328,970                | 5.78                                | Reference        |         | Reference             |         |
|                     | 1-2 days/week      | 393,223           | 5,814              | 1,726,226                | 3.37                                | 0.58 (0.57-0.60) | < 0.001 | 0.89 (0.86-0.92)      | < 0.001 |
|                     | 3-4 days/week      | 210,454           | 3,741              | 909,856                  | 4.11                                | 0.71 (0.69-0.74) | < 0.001 | 0.88 (0.84-0.91)      | < 0.001 |
|                     | ≥5 days/week       | 131,935           | 2,996              | 550,290                  | 5.44                                | 0.94 (0.91-0.98) | 0.004   | 0.87 (0.84-0.91)      | < 0.001 |
| All-cause mortality | 0 days/week        | 561,977           | 8,642              | 2,353,895                | 3.67                                | Reference        |         | Reference             |         |
|                     | 1-2 days/week      | 393,223           | 3,190              | 1,737,700                | 1.84                                | 0.50 (0.48-0.52) | < 0.001 | 0.85 (0.81-0.88)      | < 0.001 |
|                     | 3-4 days/week      | 210,454           | 2,026              | 917,287                  | 2.21                                | 0.60 (0.57-0.63) | < 0.001 | 0.78 (0.75-0.82)      | < 0.001 |
|                     | ≥5 days/week       | 131,935           | 1,788              | 555,994                  | 3.22                                | 0.88 (0.83-0.92) | < 0.001 | 0.78 (0.74-0.82)      | < 0.001 |

MACE = major adverse cardiovascular event, MetS = metabolic syndrome, MV-PA, moderate-to-vigorous physical activity, IRR = incidence rate ratio, CI = confidence interval

Multivariable model was adjusted for age, sex, baseline eGFR (continuous, mL/min/1.73 m<sup>2</sup>), alanine aminotransferase (continuous, IU/mL), aspartate aminotransferase (continuous, IU/mL), hemoglobin (continuous, g/dL), low-income status (the lowest quartile in the nation), body mass index (continuous, kg/m<sup>2</sup>), Charlson Comorbidity Index score, place of residence (urban or rural), and the number of MetS components at the baseline health screening.

**Table S16. Risks of major adverse cardiovascular events according to frequencies of moderate-to-vigorous physical activity in those with consistently free or chronically present metabolic syndrome component.**

| Subgroups and exposure                    | Number of persons | Number of MACE | Follow-up (person-years) | Incidence rate (/1000 person-years) | Model 1. Unadjusted model |         | Model 2. Age-sex adjusted model |         | Model 3. Baseline severity of MetS (number of MetS components) and other lifestyle variables (smoking, alcohol) adjusted |         |
|-------------------------------------------|-------------------|----------------|--------------------------|-------------------------------------|---------------------------|---------|---------------------------------|---------|--------------------------------------------------------------------------------------------------------------------------|---------|
|                                           |                   |                |                          |                                     | Adjusted IRR (95% CI)     | P       | Adjusted IRR (95% CI)           | P       | Adjusted IRR (95% CI)                                                                                                    | P       |
| <b>Central obesity-free</b>               |                   |                |                          |                                     |                           |         |                                 |         |                                                                                                                          |         |
| 0 days/week                               | 1,653,227         | 19,084         | 7,199,247                | 2.65                                | Reference                 |         | Reference                       |         | Reference                                                                                                                |         |
| 1-2 days/week                             | 1,407,541         | 10,100         | 6,355,181                | 1.59                                | 0.6 (0.59-0.61)           | < 0.001 | 0.9 (0.88-0.92)                 | < 0.001 | 0.93 (0.91-0.95)                                                                                                         | < 0.001 |
| 3-4 days/week                             | 696,957           | 6,025          | 3,120,635                | 1.93                                | 0.73 (0.71-0.75)          | < 0.001 | 0.83 (0.8-0.85)                 | < 0.001 | 0.86 (0.83-0.88)                                                                                                         | < 0.001 |
| ≥ 5 days/week                             | 391,800           | 4,813          | 1,706,720                | 2.82                                | 1.06 (1.03-1.1)           | < 0.001 | 0.84 (0.81-0.87)                | < 0.001 | 0.86 (0.83-0.89)                                                                                                         | < 0.001 |
| <b>Central obesity-chronic</b>            |                   |                |                          |                                     |                           |         |                                 |         |                                                                                                                          |         |
| 0 days/week                               | 373,002           | 10,934         | 1,501,075                | 7.28                                |                           |         |                                 |         |                                                                                                                          |         |
| 1-2 days/week                             | 204,696           | 3,830          | 877,334                  | 4.37                                | 0.6 (0.58-0.62)           | < 0.001 | 0.91 (0.88-0.94)                | < 0.001 | 0.94 (0.91-0.98)                                                                                                         | 0.003   |
| 3-4 days/week                             | 114,223           | 2,377          | 477,967                  | 4.97                                | 0.68 (0.65-0.71)          | < 0.001 | 0.84 (0.8-0.88)                 | < 0.001 | 0.88 (0.84-0.92)                                                                                                         | < 0.001 |
| ≥ 5 days/week                             | 75,812            | 1,921          | 306,723                  | 6.26                                | 0.86 (0.82-0.9)           | < 0.001 | 0.83 (0.79-0.87)                | < 0.001 | 0.86 (0.82-0.91)                                                                                                         | < 0.001 |
| <b>High blood pressure-free</b>           |                   |                |                          |                                     |                           |         |                                 |         |                                                                                                                          |         |
| 0 days/week                               | 1,050,775         | 5,603          | 4,562,450                | 1.23                                | Reference                 |         | Reference                       |         | Reference                                                                                                                |         |
| 1-2 days/week                             | 867,072           | 3,234          | 3,871,018                | 0.84                                | 0.68 (0.65-0.71)          | < 0.001 | 0.87 (0.83-0.91)                | < 0.001 | 0.9 (0.86-0.94)                                                                                                          | < 0.001 |
| 3-4 days/week                             | 406,945           | 1,712          | 1,797,510                | 0.95                                | 0.78 (0.73-0.82)          | < 0.001 | 0.79 (0.75-0.83)                | < 0.001 | 0.84 (0.8-0.89)                                                                                                          | < 0.001 |
| ≥ 5 days/week                             | 212,349           | 1,179          | 920,271                  | 1.28                                | 1.04 (0.98-1.11)          | 0.187   | 0.81 (0.76-0.86)                | < 0.001 | 0.86 (0.81-0.92)                                                                                                         | < 0.001 |
| <b>High blood pressure-chronic</b>        |                   |                |                          |                                     |                           |         |                                 |         |                                                                                                                          |         |
| 0 days/week                               | 635,759           | 22,936         | 2,589,510                | 8.86                                | 1 (Ref.)                  | < 0.001 | 1 (Ref.)                        | < 0.001 | 1 (Ref.)                                                                                                                 | < 0.001 |
| 1-2 days/week                             | 391,097           | 9,014          | 1,707,914                | 5.28                                | 0.6 (0.58-0.61)           | < 0.001 | 0.88 (0.86-0.9)                 | < 0.001 | 0.92 (0.9-0.95)                                                                                                          | < 0.001 |
| 3-4 days/week                             | 242,882           | 5,925          | 1,042,980                | 5.68                                | 0.64 (0.62-0.66)          | < 0.001 | 0.79 (0.77-0.81)                | < 0.001 | 0.84 (0.82-0.87)                                                                                                         | < 0.001 |
| ≥ 5 days/week                             | 169,629           | 5,151          | 697,897                  | 7.38                                | 0.83 (0.81-0.86)          | < 0.001 | 0.8 (0.78-0.83)                 | < 0.001 | 0.85 (0.83-0.88)                                                                                                         | < 0.001 |
| <b>Impaired glucose tolerance-free</b>    |                   |                |                          |                                     |                           |         |                                 |         |                                                                                                                          |         |
| 0 days/week                               | 1,366,571         | 13,549         | 5,908,689                | 2.29                                | Reference                 |         | Reference                       |         | Reference                                                                                                                |         |
| 1-2 days/week                             | 1,109,805         | 6,629          | 4,977,648                | 1.33                                | 0.58 (0.56-0.6)           | < 0.001 | 0.9 (0.87-0.93)                 | < 0.001 | 0.94 (0.91-0.96)                                                                                                         | < 0.001 |
| 3-4 days/week                             | 541,418           | 3,831          | 2,401,527                | 1.60                                | 0.7 (0.67-0.72)           | < 0.001 | 0.83 (0.8-0.86)                 | < 0.001 | 0.89 (0.86-0.92)                                                                                                         | < 0.001 |
| ≥ 5 days/week                             | 294,940           | 2,800          | 1,276,663                | 2.19                                | 0.96 (0.92-1)             | 0.032   | 0.81 (0.78-0.84)                | < 0.001 | 0.88 (0.84-0.91)                                                                                                         | < 0.001 |
| <b>Impaired glucose tolerance-chronic</b> |                   |                |                          |                                     |                           |         |                                 |         |                                                                                                                          |         |
| 0 days/week                               | 322,541           | 12,083         | 1,302,705                | 9.28                                | 1 (Ref.)                  | < 0.001 | 1 (Ref.)                        | < 0.001 | 1 (Ref.)                                                                                                                 | < 0.001 |
| 1-2 days/week                             | 201,676           | 5,061          | 870,880                  | 5.81                                | 0.63 (0.61-0.65)          | < 0.001 | 0.89 (0.86-0.92)                | < 0.001 | 0.94 (0.91-0.98)                                                                                                         | < 0.001 |
| 3-4 days/week                             | 126,855           | 3,380          | 539,761                  | 6.26                                | 0.68 (0.65-0.7)           | < 0.001 | 0.8 (0.77-0.83)                 | < 0.001 | 0.87 (0.83-0.9)                                                                                                          | < 0.001 |
| ≥ 5 days/week                             | 91,049            | 2,948          | 371,119                  | 7.94                                | 0.86 (0.82-0.89)          | < 0.001 | 0.8 (0.77-0.83)                 | < 0.001 | 0.86 (0.83-0.9)                                                                                                          | < 0.001 |
| <b>High Tg-free</b>                       |                   |                |                          |                                     |                           |         |                                 |         |                                                                                                                          |         |
| 0 days/week                               | 1,395,443         | 13,959         | 5,998,236                | 2.33                                | Reference                 |         | Reference                       |         | Reference                                                                                                                |         |
| 1-2 days/week                             | 1,100,029         | 6,374          | 4,898,158                | 1.30                                | 0.56 (0.54-0.58)          | < 0.001 | 0.9 (0.87-0.93)                 | < 0.001 | 0.95 (0.92-0.98)                                                                                                         | < 0.001 |
| 3-4 days/week                             | 567,617           | 3,947          | 2,500,091                | 1.58                                | 0.68 (0.65-0.7)           | < 0.001 | 0.81 (0.79-0.84)                | < 0.001 | 0.86 (0.83-0.89)                                                                                                         | < 0.001 |
| ≥ 5 days/week                             | 328,192           | 3,331          | 1,409,925                | 2.36                                | 1.02 (0.98-1.05)          | 0.434   | 0.83 (0.8-0.86)                 | < 0.001 | 0.87 (0.84-0.9)                                                                                                          | < 0.001 |
| <b>High Tg-chronic</b>                    |                   |                |                          |                                     |                           |         |                                 |         |                                                                                                                          |         |
| 0 days/week                               | 427,767           | 12,962         | 1,777,758                | 7.29                                | Reference                 |         | Reference                       |         | Reference                                                                                                                |         |
| 1-2 days/week                             | 311,342           | 6,117          | 1,380,051                | 4.43                                | 0.61 (0.59-0.63)          | < 0.001 | 0.89 (0.86-0.92)                | < 0.001 | 0.94 (0.91-0.97)                                                                                                         | < 0.001 |
| 3-4 days/week                             | 160,377           | 3,572          | 696,959                  | 5.13                                | 0.7 (0.68-0.73)           | < 0.001 | 0.81 (0.78-0.84)                | < 0.001 | 0.86 (0.83-0.9)                                                                                                          | < 0.001 |
| ≥ 5 days/week                             | 97,219            | 2,709          | 404,610                  | 6.70                                | 0.92 (0.88-0.96)          | < 0.001 | 0.81 (0.78-0.85)                | < 0.001 | 0.85 (0.82-0.89)                                                                                                         | < 0.001 |
| <b>Low HDL-free</b>                       |                   |                |                          |                                     |                           |         |                                 |         |                                                                                                                          |         |
| 0 days/week                               | 1,556,877         | 17,063         | 6,767,666                | 2.52                                | Reference                 |         | Reference                       |         | Reference                                                                                                                |         |
| 1-2 days/week                             | 1,347,104         | 9,063          | 6,070,028                | 1.49                                | 0.59 (0.58-0.61)          | < 0.001 | 0.9 (0.88-0.92)                 | < 0.001 | 0.94 (0.92-0.97)                                                                                                         | < 0.001 |
| 3-4 days/week                             | 668,382           | 5,390          | 2,991,964                | 1.80                                | 0.71 (0.69-0.74)          | < 0.001 | 0.83 (0.81-0.86)                | < 0.001 | 0.89 (0.87-0.92)                                                                                                         | < 0.001 |
| ≥ 5 days/week                             | 374,961           | 4,189          | 1,634,768                | 2.56                                | 1.02 (0.98-1.05)          | 0.347   | 0.83 (0.8-0.86)                 | < 0.001 | 0.88 (0.85-0.91)                                                                                                         | < 0.001 |
| <b>Low HDL-chronic</b>                    |                   |                |                          |                                     |                           |         |                                 |         |                                                                                                                          |         |
| 0 days/week                               | 296,655           | 9,335          | 1,195,777                | 7.81                                | Reference                 |         | Reference                       |         | Reference                                                                                                                |         |
| 1-2 days/week                             | 157,794           | 3,406          | 676,315                  | 5.04                                | 0.64 (0.62-0.67)          | < 0.001 | 0.88 (0.84-0.92)                | < 0.001 | 0.92 (0.89-0.96)                                                                                                         | < 0.001 |
| 3-4 days/week                             | 98,268            | 2,251          | 408,466                  | 5.51                                | 0.71 (0.67-0.74)          | < 0.001 | 0.78 (0.75-0.82)                | < 0.001 | 0.83 (0.79-0.87)                                                                                                         | < 0.001 |
| ≥ 5 days/week                             | 67,719            | 1,904          | 272,183                  | 7.00                                | 0.9 (0.85-0.94)           | < 0.001 | 0.8 (0.76-0.84)                 | < 0.001 | 0.84 (0.8-0.88)                                                                                                          | < 0.001 |

MetS = metabolic syndrome, IRR = incidence rate ratio, CI = confidence interval, Tg = triglyceride, HDL = high-density lipoprotein cholesterol

<sup>a</sup> Model 3 was adjusted for age, sex, baseline eGFR (continuous, mL/min/1.73 m<sup>2</sup>), alanine aminotransferase (continuous, IU/mL), hemoglobin (continuous, g/dL), low income status (the lowest quartile in the nation), body mass index (continuous, kg/m<sup>2</sup>), and Charlson Comorbidity Index, place of residences (urban or rural) and the number of MetS components at the baseline (S1) health screening, and the other lifestyle variables (smoking; none, previous, current and alcohol consumption; none, moderate, heavy)

**Table S17. Risks of all-cause mortality according to frequencies of moderate-to-vigorous physical activity in those with consistently free or chronically present metabolic syndrome component.**

| Subgroups and exposure                    | Number of persons | Number of deaths | Follow-up (person-years) | Incidence rate (/1000 person-years) | Model 1. Unadjusted model |         | Model 2. Age-sex adjusted model |         | Model 3. Baseline severity of MetS (number of MetS components) and other lifestyle variables (smoking, alcohol) adjusted |         |
|-------------------------------------------|-------------------|------------------|--------------------------|-------------------------------------|---------------------------|---------|---------------------------------|---------|--------------------------------------------------------------------------------------------------------------------------|---------|
|                                           |                   |                  |                          |                                     | Adjusted IRR (95% CI)     | P       | Adjusted IRR (95% CI)           | P       | Adjusted IRR (95% CI)                                                                                                    | P       |
| <b>Central obesity-free</b>               |                   |                  |                          |                                     |                           |         |                                 |         |                                                                                                                          |         |
| 0 days/week                               | 1,653,227         | 16,751           | 7,235,006                | 2.32                                | Reference                 |         | Reference                       |         | Reference                                                                                                                |         |
| 1-2 days/week                             | 1,407,541         | 7,126            | 6,375,448                | 1.12                                | 0.48 (0.47-0.5)           | < 0.001 | 0.75 (0.73-0.77)                | < 0.001 | 0.85 (0.82-0.87)                                                                                                         | < 0.001 |
| 3-4 days/week                             | 696,957           | 4,485            | 3,132,640                | 1.43                                | 0.62 (0.6-0.64)           | < 0.001 | 0.71 (0.69-0.74)                | < 0.001 | 0.83 (0.81-0.86)                                                                                                         | < 0.001 |
| ≥ 5 days/week                             | 391,800           | 3,942            | 1,715,988                | 2.30                                | 0.99 (0.96-1.03)          | 0.658   | 0.77 (0.74-0.8)                 | < 0.001 | 0.87 (0.84-0.9)                                                                                                          | < 0.001 |
| <b>Central obesity-chronic</b>            |                   |                  |                          |                                     |                           |         |                                 |         |                                                                                                                          |         |
| 0 days/week                               | 373,002           | 5,166            | 1,521,190                | 3.40                                | 1 (Ref.)                  | < 0.001 | 1 (Ref.)                        | < 0.001 | 1 (Ref.)                                                                                                                 | < 0.001 |
| 1-2 days/week                             | 204,696           | 1,543            | 884,959                  | 1.74                                | 0.51 (0.49-0.54)          | < 0.001 | 0.8 (0.75-0.85)                 | < 0.001 | 0.85 (0.8-0.9)                                                                                                           | < 0.001 |
| 3-4 days/week                             | 114,223           | 978              | 482,688                  | 2.03                                | 0.6 (0.56-0.64)           | < 0.001 | 0.73 (0.68-0.78)                | < 0.001 | 0.77 (0.72-0.83)                                                                                                         | < 0.001 |
| ≥ 5 days/week                             | 75,812            | 904              | 310,321                  | 2.91                                | 0.86 (0.8-0.92)           | < 0.001 | 0.78 (0.73-0.84)                | < 0.001 | 0.81 (0.76-0.87)                                                                                                         | < 0.001 |
| <b>High blood pressure-free</b>           |                   |                  |                          |                                     |                           |         |                                 |         |                                                                                                                          |         |
| 0 days/week                               | 1,050,775         | 4,776            | 4,572,913                | 1.04                                | Reference                 |         | Reference                       |         | Reference                                                                                                                |         |
| 1-2 days/week                             | 867,072           | 2,494            | 3,877,338                | 0.64                                | 0.62 (0.59-0.65)          | < 0.001 | 0.76 (0.73-0.8)                 | < 0.001 | 0.84 (0.8-0.88)                                                                                                          | < 0.001 |
| 3-4 days/week                             | 406,945           | 1,455            | 1,800,830                | 0.81                                | 0.77 (0.73-0.82)          | < 0.001 | 0.77 (0.73-0.82)                | < 0.001 | 0.85 (0.8-0.91)                                                                                                          | < 0.001 |
| ≥ 5 days/week                             | 212,349           | 1,085            | 922,515                  | 1.18                                | 1.13 (1.05-1.2)           | < 0.001 | 0.85 (0.79-0.91)                | < 0.001 | 0.9 (0.84-0.96)                                                                                                          | 0.001   |
| <b>High blood pressure-chronic</b>        |                   |                  |                          |                                     |                           |         |                                 |         |                                                                                                                          |         |
| 0 days/week                               | 635,759           | 14,098           | 2,632,115                | 5.36                                | 1 (Ref.)                  | < 0.001 | 1 (Ref.)                        | < 0.001 | 1 (Ref.)                                                                                                                 | < 0.001 |
| 1-2 days/week                             | 391,097           | 4,492            | 1,726,092                | 2.60                                | 0.49 (0.47-0.5)           | < 0.001 | 0.76 (0.74-0.79)                | < 0.001 | 0.84 (0.81-0.87)                                                                                                         | < 0.001 |
| 3-4 days/week                             | 242,882           | 3,175            | 1,054,728                | 3.01                                | 0.56 (0.54-0.58)          | < 0.001 | 0.7 (0.68-0.73)                 | < 0.001 | 0.77 (0.74-0.8)                                                                                                          | < 0.001 |
| ≥ 5 days/week                             | 169,629           | 2,989            | 707,734                  | 4.22                                | 0.79 (0.76-0.82)          | < 0.001 | 0.72 (0.69-0.75)                | < 0.001 | 0.78 (0.75-0.81)                                                                                                         | < 0.001 |
| <b>Impaired glucose tolerance-free</b>    |                   |                  |                          |                                     |                           |         |                                 |         |                                                                                                                          |         |
| 0 days/week                               | 1,366,571         | 9,699            | 5,933,883                | 1.63                                | Reference                 |         | Reference                       |         | Reference                                                                                                                |         |
| 1-2 days/week                             | 1,109,805         | 4,078            | 4,990,844                | 0.82                                | 0.5 (0.48-0.52)           | < 0.001 | 0.75 (0.72-0.78)                | < 0.001 | 0.82 (0.79-0.85)                                                                                                         | < 0.001 |
| 3-4 days/week                             | 541,418           | 2,499            | 2,409,100                | 1.04                                | 0.63 (0.61-0.66)          | < 0.001 | 0.74 (0.7-0.77)                 | < 0.001 | 0.81 (0.78-0.85)                                                                                                         | < 0.001 |
| ≥ 5 days/week                             | 294,940           | 2,033            | 1,282,111                | 1.59                                | 0.97 (0.92-1.02)          | 0.214   | 0.78 (0.75-0.82)                | < 0.001 | 0.85 (0.81-0.89)                                                                                                         | < 0.001 |
| <b>Impaired glucose tolerance-chronic</b> |                   |                  |                          |                                     |                           |         |                                 |         |                                                                                                                          |         |
| 0 days/week                               | 322,541           | 7,525            | 1,325,296                | 5.68                                | Reference                 |         | Reference                       |         | Reference                                                                                                                |         |
| 1-2 days/week                             | 201,676           | 2,539            | 880,948                  | 2.88                                | 0.51 (0.49-0.53)          | < 0.001 | 0.75 (0.71-0.78)                | < 0.001 | 0.82 (0.79-0.86)                                                                                                         | < 0.001 |
| 3-4 days/week                             | 126,855           | 1,791            | 546,513                  | 3.28                                | 0.58 (0.55-0.61)          | < 0.001 | 0.68 (0.65-0.72)                | < 0.001 | 0.74 (0.71-0.78)                                                                                                         | < 0.001 |
| ≥ 5 days/week                             | 91,049            | 1,800            | 376,786                  | 4.78                                | 0.84 (0.8-0.89)           | < 0.001 | 0.73 (0.7-0.77)                 | < 0.001 | 0.78 (0.74-0.82)                                                                                                         | < 0.001 |
| <b>High Tg-free</b>                       |                   |                  |                          |                                     |                           |         |                                 |         |                                                                                                                          |         |
| 0 days/week                               | 1,395,443         | 13,039           | 6,023,606                | 2.16                                | Reference                 |         | Reference                       |         | Reference                                                                                                                |         |
| 1-2 days/week                             | 1,100,029         | 5,050            | 4,910,424                | 1.03                                | 0.48 (0.46-0.49)          | < 0.001 | 0.76 (0.74-0.79)                | < 0.001 | 0.84 (0.81-0.87)                                                                                                         | < 0.001 |
| 3-4 days/week                             | 567,617           | 3,310            | 2,507,661                | 1.32                                | 0.61 (0.59-0.63)          | < 0.001 | 0.72 (0.69-0.75)                | < 0.001 | 0.82 (0.78-0.85)                                                                                                         | < 0.001 |
| ≥ 5 days/week                             | 328,192           | 3,034            | 1,416,202                | 2.14                                | 0.99 (0.95-1.03)          | 0.607   | 0.77 (0.74-0.8)                 | < 0.001 | 0.85 (0.82-0.89)                                                                                                         | < 0.001 |
| <b>High Tg-chronic</b>                    |                   |                  |                          |                                     |                           |         |                                 |         |                                                                                                                          |         |
| 0 days/week                               | 427,767           | 6,133            | 1,802,514                | 3.40                                | Reference                 |         | Reference                       |         | Reference                                                                                                                |         |
| 1-2 days/week                             | 311,342           | 2,446            | 1,392,563                | 1.76                                | 0.52 (0.49-0.54)          | < 0.001 | 0.79 (0.75-0.83)                | < 0.001 | 0.85 (0.81-0.89)                                                                                                         | < 0.001 |
| 3-4 days/week                             | 160,377           | 1,531            | 704,123                  | 2.17                                | 0.64 (0.6-0.68)           | < 0.001 | 0.74 (0.7-0.79)                 | < 0.001 | 0.79 (0.74-0.83)                                                                                                         | < 0.001 |
| ≥ 5 days/week                             | 97,219            | 1,309            | 409,983                  | 3.19                                | 0.94 (0.88-1)             | 0.037   | 0.79 (0.74-0.83)                | < 0.001 | 0.83 (0.78-0.88)                                                                                                         | < 0.001 |
| <b>Low HDL-free</b>                       |                   |                  |                          |                                     |                           |         |                                 |         |                                                                                                                          |         |
| 0 days/week                               | 1,556,877         | 14,883           | 6,799,437                | 2.19                                | Reference                 |         | Reference                       |         | Reference                                                                                                                |         |
| 1-2 days/week                             | 1,347,104         | 6,613            | 6,087,912                | 1.09                                | 0.5 (0.48-0.51)           | < 0.001 | 0.77 (0.75-0.79)                | < 0.001 | 0.85 (0.82-0.87)                                                                                                         | < 0.001 |
| 3-4 days/week                             | 668,382           | 4,097            | 3,002,588                | 1.36                                | 0.62 (0.6-0.65)           | < 0.001 | 0.73 (0.71-0.76)                | < 0.001 | 0.82 (0.8-0.85)                                                                                                          | < 0.001 |
| ≥ 5 days/week                             | 374,961           | 3,578            | 1,642,865                | 2.18                                | 0.99 (0.96-1.03)          | 0.788   | 0.79 (0.76-0.82)                | < 0.001 | 0.86 (0.83-0.9)                                                                                                          | < 0.001 |
| <b>Low HDL-chronic</b>                    |                   |                  |                          |                                     |                           |         |                                 |         |                                                                                                                          |         |
| 0 days/week                               | 296,655           | 4,459            | 1,213,168                | 3.68                                | Reference                 |         | Reference                       |         | Reference                                                                                                                |         |
| 1-2 days/week                             | 157,794           | 1,318            | 683,112                  | 1.93                                | 0.52 (0.49-0.56)          | < 0.001 | 0.77 (0.72-0.82)                | < 0.001 | 0.83 (0.78-0.89)                                                                                                         | < 0.001 |
| 3-4 days/week                             | 98,268            | 966              | 412,846                  | 2.34                                | 0.64 (0.59-0.68)          | < 0.001 | 0.73 (0.68-0.78)                | < 0.001 | 0.78 (0.73-0.84)                                                                                                         | < 0.001 |
| ≥ 5 days/week                             | 67,719            | 903              | 275,775                  | 3.27                                | 0.89 (0.83-0.96)          | 0.002   | 0.76 (0.71-0.82)                | < 0.001 | 0.8 (0.75-0.86)                                                                                                          | < 0.001 |

MetS = metabolic syndrome, IRR = incidence rate ratio, CI = confidence interval, Tg = triglyceride, HDL = high-density lipoprotein cholesterol

<sup>a</sup> Model 3 was adjusted for age, sex, baseline eGFR (continuous, mL/min/1.73 m<sup>2</sup>), alanine aminotransferase (continuous, IU/mL), hemoglobin (continuous, g/dL), low income status (the lowest quartile in the nation), body mass index (continuous, kg/m<sup>2</sup>), and Charlson Comorbidity Index, place of residences (urban or rural) and the number of MetS components at the baseline (S1) health screening, and the other lifestyle variables (smoking; none, previous, current and alcohol consumption; none, moderate, heavy)

**Figure S1. Graphical description of the study population.**

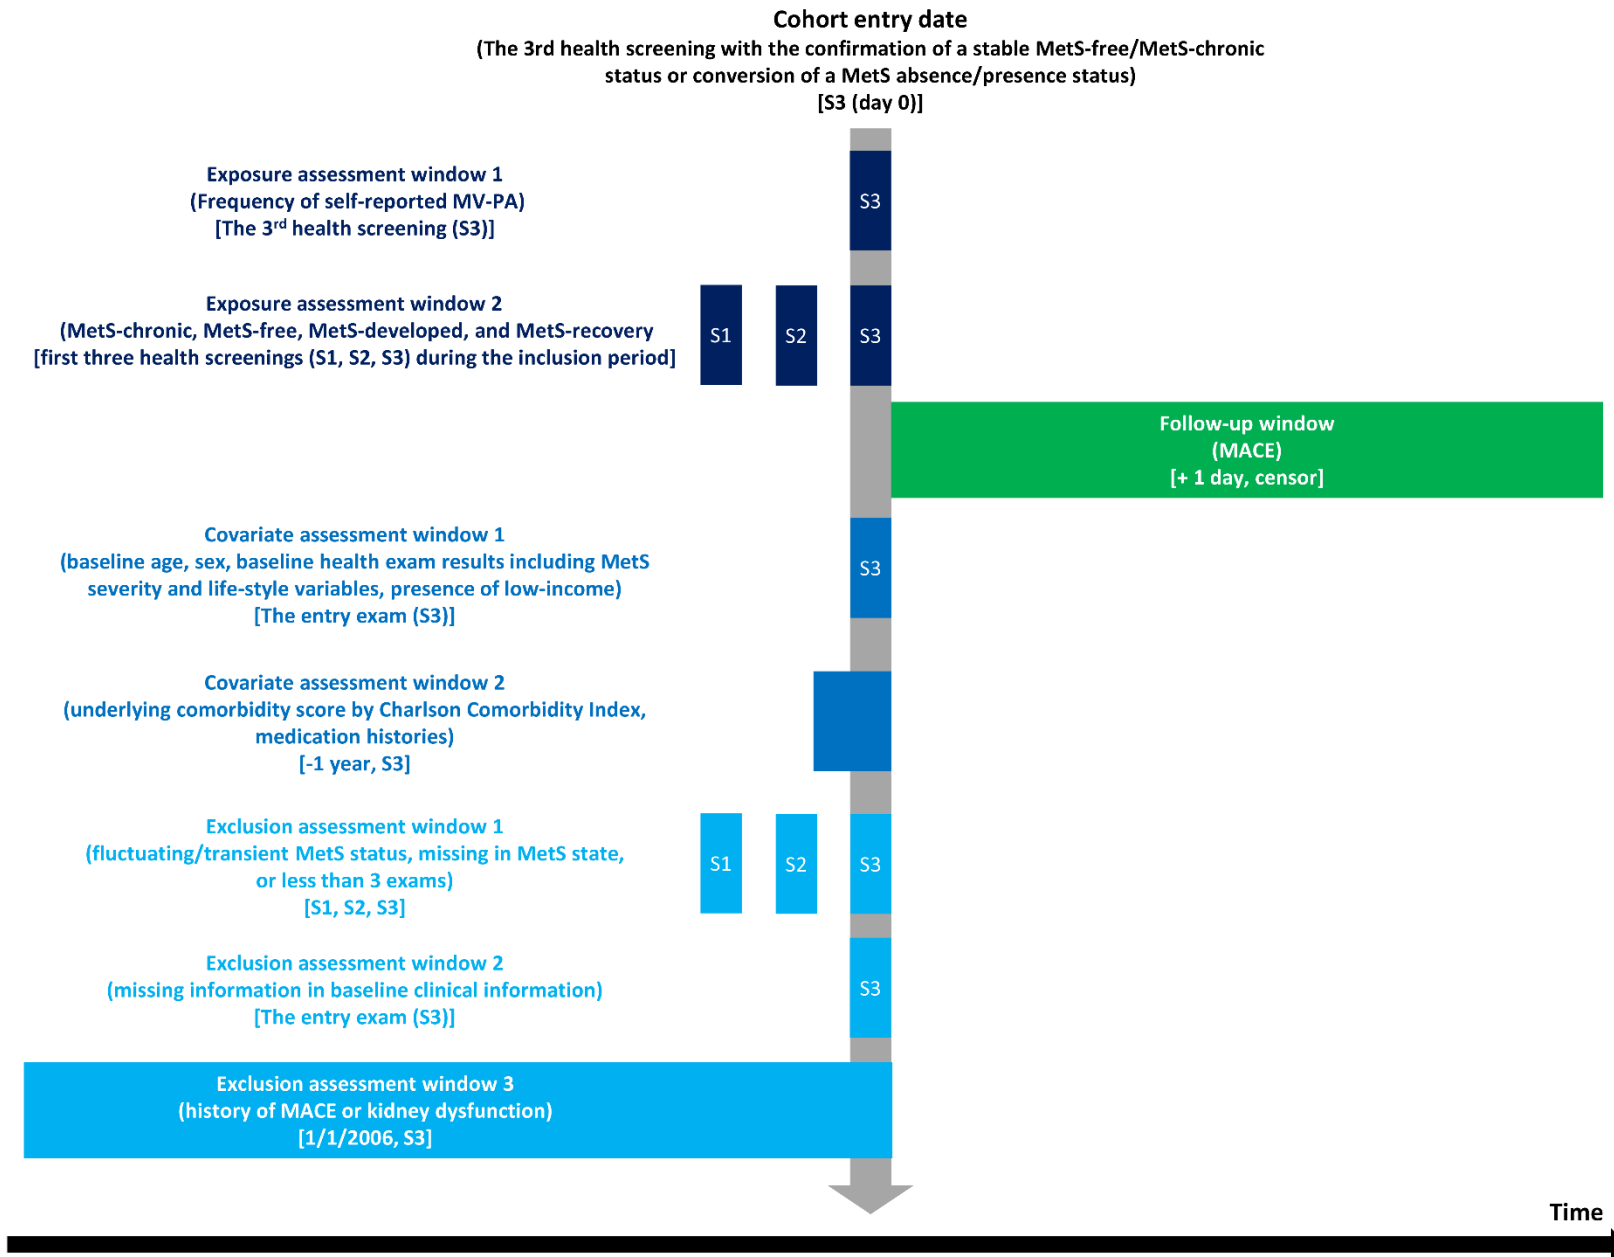

MetS = metabolic syndrome, MV-PA = moderate-to vigorous physical activity, MACE = major adverse cardiovascular events

**Figure S2. English version questionnaire used in general health screenings by the National Health Insurance Service of Korea.**

[Annex No. 1] <Front>

### National Screening Program

Regular checkup       Life cycle-based checkup

\* Answers must be provided for all questions so the information will be reported correctly.

|                 |  |                    |  |           |              |   |
|-----------------|--|--------------------|--|-----------|--------------|---|
| First Name      |  | Residential ID No. |  | Telephone | Home         |   |
| Given Name      |  |                    |  |           | Mobile phone |   |
| Current address |  |                    |  |           | Zip code     | - |
|                 |  |                    |  |           | E-mail       |   |

**\* These are questions about your medical history.**

\* Please answer the following questions about your present condition by ticking the appropriate box.

1. Have you ever been diagnosed by a doctor with any of the following diseases (Box a) or are you currently taking any medication (Box b)?

| Disease | Brain stroke / paralysis | Heart disease (cardiac infarction / angina) | High blood pressure | Diabetes | Dyslipidemia | Tuberculosis | Others (including cancer) |
|---------|--------------------------|---------------------------------------------|---------------------|----------|--------------|--------------|---------------------------|
| a       |                          |                                             |                     |          |              |              |                           |
| b       |                          |                                             |                     |          |              |              |                           |

2. Has anyone in your family died from or gotten any of the following diseases?

| Disease | Brain stroke / paralysis | Heart disease (cardiac infarction / angina) | High blood pressure | Diabetes | Others (including cancer) |
|---------|--------------------------|---------------------------------------------|---------------------|----------|---------------------------|
| Yes     |                          |                                             |                     |          |                           |

3. Are you a Hepatitis B virus antigen carrier?      ① Yes      ② No      ③ No idea

**\* These are questions about smoking.**

4. Please answer the following questions about your present condition by ticking the appropriate box.

4-1. Have you ever smoked over 5 packs of tobacco (100 cigarettes) in your life?

- ① No, I never smoked. (☞ Go to Question 5)      ② Yes, I used to smoke but I stopped. (☞ Go to Question 4-2)  
 ③ Yes, I'm still smoking (☞ Go to Question 4-3)

4-2. If you used to smoke but stopped, please answer the following.

|                                                                        |                   |
|------------------------------------------------------------------------|-------------------|
| For how many years had you smoked?                                     | Total _____ years |
| How many cigarettes in a typical day did you smoke before you stopped? | _____ cigarettes  |

4-3. If you are still smoking, please answer the following.

|                                                               |                   |
|---------------------------------------------------------------|-------------------|
| How long have you been smoking?                               | Total _____ years |
| How many cigarettes on average do you smoke on a regular day? | _____ cigarettes  |

**\* These are questions about drinking.**

5. Please answer the following questions about your current drinking habit by ticking the appropriate box.

5-1. How many times a week do you drink alcohol?

- 0     1     2     3     4     5     6     7

5-2. When you drink, how much do you usually drink on a regular day? ( \_\_\_\_\_ glass(es))

(☞ No matter what kind of liquor it may be, each glass will be considered as 1 glass. However, 1 can of beer (355 cc) is equal to 1.6 glasses of beer.)

**\* These are questions about exercising.**

6. These are questions about your physical activity for the last week. Please answer the following questions by ticking the appropriate box.

6-1. During the last week, how many days did you exercise vigorously for over 20 minutes until you were almost out of breath? (example: running, aerobics, high-speed cycling, mountain hiking, etc.)

0  1  2  3  4  5  6  7

6-2. During the last week, how many days did you exercise in a moderate level for more than 30 minutes until you had to breathe a little faster than usual? (example: fast walking, tennis, bicycle riding, cleaning, etc.) \* Except the relevant answer from 6-1

0  1  2  3  4  5  6  7

6-3. During the last week, how many days did you walk for a total of 30 minutes or more in a day, including separate 10-minute walks? (example: light exercise, walk for work or for leisure, etc.)

\* Please exclude exercises you answered in 6-1 and 6-2

0  1  2  3  4  5  6  7

**\* These are questions about cognitive functions. (Only answer if you are 66, 70, or 74 years old.)**  
(If a family member accompanied you, please let him/her answer the questions. If not, answer the following questions by yourself.)

7. Please answer the following questions about your current cognitive condition compared to last year by ticking the appropriate box.

7-1. Compared to friends or other people, your memory is worse than others.

① No    ② Occasionally    ③ Yes

7-2. Your memory is worse compared to last year.

① No    ② Occasionally    ③ Yes

7-3. You experience problems related to your memory when handling important matters.

① No    ② Occasionally    ③ Yes

7-4. Has anyone noticed that you have a short memory?

① No    ② Occasionally    ③ Yes

7-5. Do you experience difficulties in performing daily chores that you used to do well before?

① No    ② Occasionally    ③ Yes

**\* Emotional status (Only answer if you are 40 years old.)**

8. Please identify how many times you experienced the following during the last week by ticking the appropriate box.

| During the last week, I                                             | Hardly ever<br>(less than 1<br>day) | Not too often<br>(couple of<br>days) | Sometimes<br>(more than 3<br>days) | Always<br>(over 5 days) |
|---------------------------------------------------------------------|-------------------------------------|--------------------------------------|------------------------------------|-------------------------|
| 8-1. Was annoyed and bothered by things that were not there before. |                                     |                                      |                                    |                         |
| 8-2. Did not want to eat and even lost appetite.                    |                                     |                                      |                                    |                         |
| 8-3. Felt sad even when someone tried to help me out.               |                                     |                                      |                                    |                         |
| 8-4. Felt depressed.                                                |                                     |                                      |                                    |                         |

\* Please complete this form with Annex No. 2 only 66 years old.
